# Supplementary material for: Sulfated Phenolic Substances: Preparation and Optimized HPLC Analysis
Source: MDPI journal article supplement (doi:10.3390/ijms23105743), 2022-05-20
Supplement: s1 [file s1]

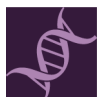

*Supplementary Materials*

# Sulfated Phenolic Substances: Preparation and Optimized HPLC Analysis

Lucie Petrásková<sup>1</sup>, Kristýna Káňová<sup>1,2</sup>, Katerina Brodsky<sup>1,2</sup>, Anastasiia Hetman<sup>1,3</sup>, Barbora Petránková<sup>1,4</sup>, Helena Pelantová<sup>1</sup>, Vladimír Křen<sup>1</sup>, Kateřina Valentová<sup>1,\*</sup>

## TABLE OF CONTENTS

|     |                                                                                   |    |
|-----|-----------------------------------------------------------------------------------|----|
| 1   | ABBREVIATIONS OF THE COMPOUNDS USED IN THE STUDY .....                            | 2  |
| 2   | STRUCTURAL CHARACTERIZATION OF PREPARED COMPOUNDS .....                           | 3  |
| 2.1 | 4-Methylcatechol- <i>O</i> -sulfates (MeCAT-S) .....                              | 3  |
| 2.2 | Protocatechuic acid <i>O</i> -sulfates (PRO-S) .....                              | 4  |
| 2.3 | 2,3,4-Trihydroxybenzoic acid <i>O</i> -sulfates (THB-S) .....                     | 6  |
| 2.4 | Caffeic acid <i>O</i> -sulfates (CAF-S) .....                                     | 8  |
| 2.5 | Catechol-1- <i>O</i> -sulfate (CAT-S) .....                                       | 9  |
| 2.6 | Phloroglucinol- <i>O</i> -sulfate (PG-S).....                                     | 10 |
| 3   | RETENTION TIMES, WIDTHS OF THE PEAKS AND ABSORPTION MAXIMA OF THE COMPOUNDS ..... | 12 |
| 3.1 | Methods without buffer in the mobile phase .....                                  | 12 |
| 3.2 | Methods with ammonium acetate buffer in the mobile phase .....                    | 15 |
| 4   | COMPARISON OF HPLC CHROMATOGRAMS FOR INDIVIDUAL COMPOUNDS..                       | 19 |



## 1 ABBREVIATIONS OF THE COMPOUNDS USED IN THE STUDY

|               |                                                           |
|---------------|-----------------------------------------------------------|
| AMP           | ampelopsin                                                |
| AMP-S         | ampelopsin-4'-O-sulfate                                   |
| CAF           | caffeic acid                                              |
| CAF-S         | caffeic acid 3- and 4-O-sulfate (69:31)                   |
| CAT           | catechol                                                  |
| CAT-S         | catechol-O-sulfate                                        |
| DHSB          | 2,3-dehydrosilybin                                        |
| DHSB-S        | 2,3-dehydrosilybin-20-O-sulfate                           |
| DHSB-SS       | 2,3-dehydrosilybin-7,20-di-O-sulfate                      |
| DHSCH         | 2,3-dehydrosilychristin                                   |
| DHSCH-S       | 2,3-dehydrosilychristin-19-O-sulfate                      |
| ISQ           | isoquercitrin                                             |
| ISQ-S         | isoquercitrin-4'-O-sulfate                                |
| LUT           | luteolin                                                  |
| LUT-S         | luteolin-3'-O-sulfate                                     |
| LUT-SS        | luteolin-7,3'- and 7, 4'-di-O-sulfates (82:12)            |
| MeCAT         | 4-methylcatechol                                          |
| MeCAT-S       | 4-methylcatechol-1- and 2-O-sulfate (64:36)               |
| MYR           | myricetin                                                 |
| MYR-S         | myricetin-4'-O-sulfate                                    |
| MYR-SS        | myricetin-7,4'-di-O-sulfate                               |
| <i>p</i> -NP  | <i>p</i> -nitrophenol                                     |
| <i>p</i> -NPS | <i>p</i> -nitrophenyl sulfate                             |
| PG            | phloroglucinol                                            |
| PG-S          | phloroglucinol-O-sulfate                                  |
| PRO           | protocatechuic acid                                       |
| PRO-S         | protocatechuic acid 3- and 4-O-sulfates (70:30)           |
| QUE           | quercetin                                                 |
| QUE-S         | quercetin-3'- and 4'-O-sulfate (75:25)                    |
| QUE-SS        | quercetin- 3',4'-, 7,3'- and 7, 4'-di-O-sulfate           |
| RUT           | rutin                                                     |
| RUT-S         | rutin-4'-O-sulfate                                        |
| SB            | silybin A and B (50:50)                                   |
| SB-S          | silybin A-20-O-sulfate and silybin B-20-O-sulfate (50:50) |
| SCH           | silychristin A and B (90:10)                              |
| SCH-S         | silychristin-19-O-sulfate                                 |
| THB           | 2,3,4-trihydroxybenzoic acid                              |
| THB           | 2,3,4-trihydroxybenzoic acid                              |
| TX            | taxifolin                                                 |
| TX-S          | taxifolin-4'- and 3'-O-sulfate (80:20)                    |



## 2 STRUCTURAL CHARACTERIZATION OF PREPARED COMPOUNDS

NMR spectra were recorded on a Bruker Avance III 600 MHz and 400 MHz spectrometer at 30 °C in dimethylsulfoxide (DMSO- $d_6$ ); residual solvent signal ( $\delta_H$  2.499 ppm,  $\delta_C$  39.46 ppm) served as an internal standard. NMR experiments:  $^1H$  NMR,  $^{13}C$  NMR, gCOSY, gHSQC, and gHMBC were performed using the standard manufacturer's software.

The position of sulfate attachment was determined using typical changes in chemical shifts of the attached and adjacent carbons (compared with starting acceptors) as described in [1].

### 2.1 4-Methylcatechol-O-sulfates (MeCAT-S)

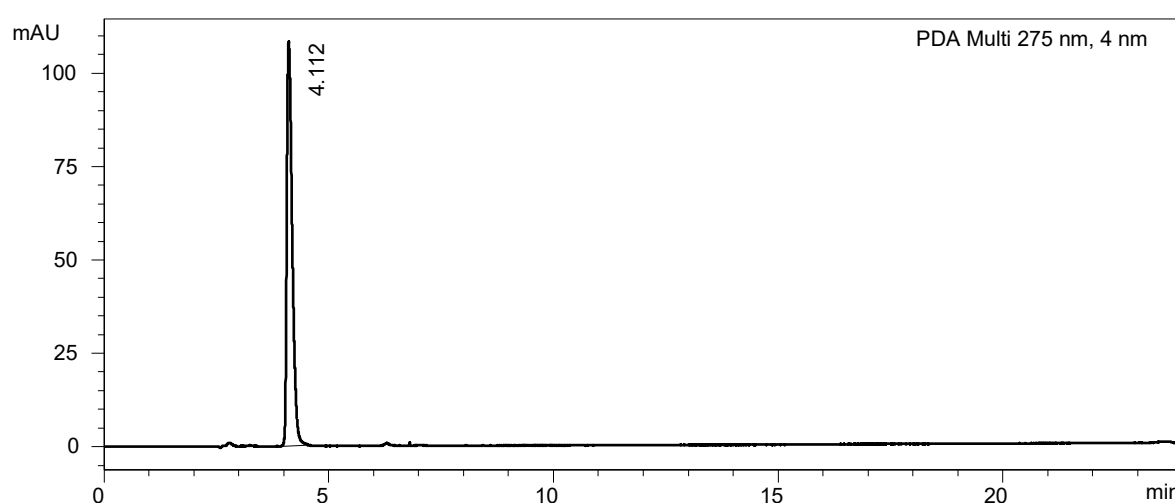

**Figure S1.** HPLC chromatogram of 4-methylcatechol-*O*-sulfates (MeCAT, regioisomers), method M1 (RT= 4.112 min, 99% purity)

**Table S8a.**  $^{13}C$  and  $^1H$  NMR data of 4-methylcatechol-1-*O*-sulfate (600.23 MHz for  $^1H$ , 150.93 MHz for  $^{13}C$ , DMSO- $d_6$ , 30 °C)

| Atom | $\delta_C$ [ppm] | $m$ | $\delta_H$ [ppm] | $n(H)$ | $m$ | $J$ [HZ]      |
|------|------------------|-----|------------------|--------|-----|---------------|
| 1    | 138.58           | S   | -                | 0      | -   | -             |
| 2    | 148.82           | S   | -                | 0      | -   | -             |
| 3    | 117.70           | D   | 6.630            | 1      | dq  | 2.1, 0.8      |
| 4    | 134.11           | S   | -                | 0      | -   | -             |
| 5    | 119.78           | D   | 6.538            | 1      | ddq | 8.1, 2.1, 0.8 |
| 6    | 122.88           | D   | 6.937            | 1      | d   | 8.1           |
| 1-Me | 20.36            | Q   | 2.188            | 3      | m   | -             |

$\delta$  - chemical shift,  $m$  – multiplicity,  $n$  – number of hydrogens,  $J$  – interaction constant



**Table S8b.**  $^{13}\text{C}$  and  $^1\text{H}$  NMR data of 4-methylcatechol-2-*O*-sulfate (600.23 MHz for  $^1\text{H}$ , 150.93 MHz for  $^{13}\text{C}$ , DMSO- $d_6$ , 30 °C)

| Atom | $\delta_{\text{C}}$ [ppm] | $m$ | $\delta_{\text{H}}$ [ppm] | $n(\text{H})$ | $m$ | $J$ [HZ]      |
|------|---------------------------|-----|---------------------------|---------------|-----|---------------|
| 1    | 146.76                    | S   | -                         | 0             | -   | -             |
| 2    | 140.46                    | S   | -                         | 0             | -   | -             |
| 3    | 123.54                    | D   | 6.904                     | 1             | dq  | 2.1, 0.8      |
| 4    | 128.06                    | S   | -                         | 0             | -   | -             |
| 5    | 125.18                    | D   | 6.749                     | 1             | ddq | 8.1, 2.1, 0.8 |
| 6    | 116.88                    | D   | 6.693                     | 1             | d   | 8.1           |
| 1-Me | 19.95                     | Q   | 2.175                     | 3             | m   | -             |

$\delta$  - chemical shift,  $m$  – multiplicity,  $n$  – number of hydrogens,  $J$  – interaction constant

molar ratio 1-*O*-sulfate : 2-*O*-sulfate = 64 : 36

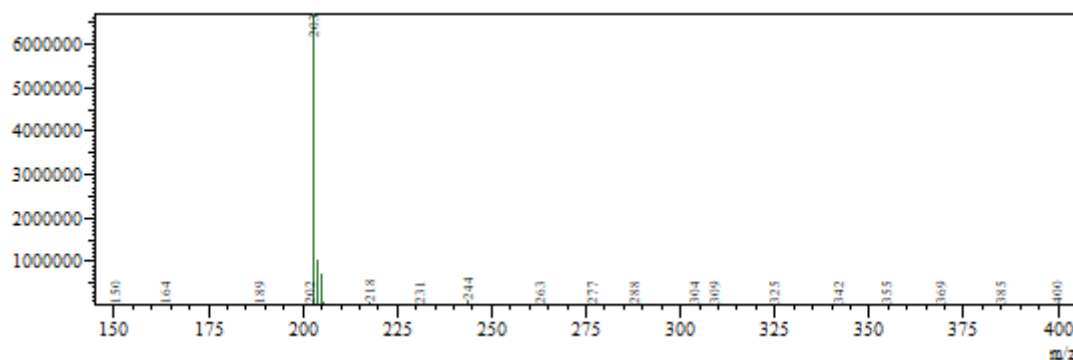

**Figure S2.** MS-ESI spectrum of 4-methylcatechol-*O*-sulfate ( $[\text{M} - \text{H}]^-$ ,  $m/z$  calcd for  $\text{C}_7\text{H}_7\text{O}_5\text{S}$ : 203.01; found: 203)

## 2.2 Protocatechuic acid *O*-sulfates (PRO-S)

mAU

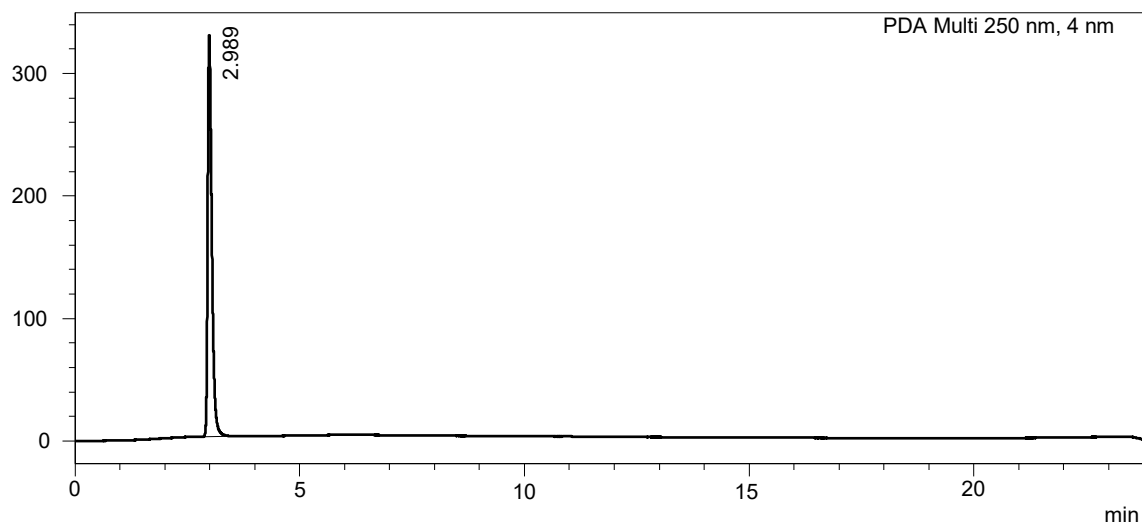



**Figure S3.** HPLC chromatogram of protocatechuic acid *O*-sulfates (PRO-S, regioisomers), method M1 (RT = 2.989 min, 99% purity)

**Table S9a.**  $^{13}\text{C}$  and  $^1\text{H}$  NMR data of protocatechuic acid 3-*O*-sulfate (399.87 MHz for  $^1\text{H}$ , 100.55 MHz for  $^{13}\text{C}$ , DMSO- $d_6$ , 30 °C)

| Atom | $\delta_c$ [ppm]   | $m$ | $\delta_H$ [ppm] | $n(\text{H})$ | $m$ | $J$ [HZ] |
|------|--------------------|-----|------------------|---------------|-----|----------|
| 1    | 124.7 <sup>H</sup> | S   | -                | 0             | -   | -        |
| 2    | 123.79             | D   | 7.766            | 1             | d   | 2.0      |
| 3    | 140.33             | S   | -                | 0             | -   | -        |
| 4    | 152.26             | S   | -                | 0             | -   | -        |
| 5    | 116.13             | D   | 6.810            | 1             | d   | 8.4      |
| 6    | 126.06             | D   | 7.516            | 1             | dd  | 8.4, 2.0 |
| CO   | 168.16             | S   | -                | 0             | -   | -        |

$\delta$ - chemical shift,  $m$  – multiplicity,  $n$  – number of hydrogens,  $J$  – interaction constant, <sup>H</sup> HMBC readout

**Table S9b.**  $^{13}\text{C}$  and  $^1\text{H}$  NMR data of protocatechuic acid 4-*O*-sulfate (399.87 MHz for  $^1\text{H}$ , 100.55 MHz for  $^{13}\text{C}$ , DMSO- $d_6$ , 30 °C)

| Atom | $\delta_c$ [ppm]   | $m$ | $\delta_H$ [ppm] | $n(\text{H})$ | $m$ | $J$ [HZ] |
|------|--------------------|-----|------------------|---------------|-----|----------|
| 1    | n.d.               | S   | -                | 0             | -   | -        |
| 2    | 117.7 <sup>H</sup> | D   | 7.342            | 1             | d   | 2.0      |
| 3    | 148.0 <sup>H</sup> | S   | -                | 0             | -   | -        |
| 4    | n.d.               | S   | -                | 0             | -   | -        |
| 5    | 121.3 <sup>H</sup> | D   | 7.209            | 1             | d   | 8.3      |
| 6    | 120.50             | D   | 7.301            | 1             | dd  | 8.3, 2.0 |
| CO   | n.d.               | S   | -                | 0             | -   | -        |

n.d. - not detected, <sup>H</sup> - HSQC/HMBC readout,  $\delta$ - chemical shift,  $m$  – multiplicity,  $n$  – number of hydrogens,  $J$  – interaction constant

molar ratio 3-*O*-sulfate : 4-*O*-sulfate = 70 : 30

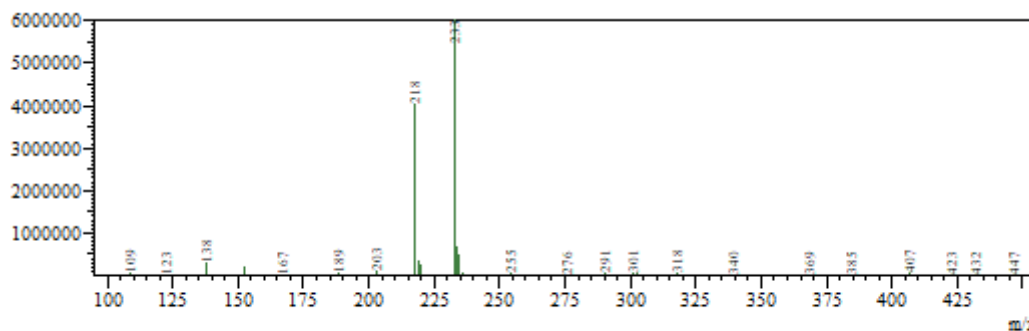

**Figure S4.** MS-ESI spectrum of protocathechuic acid O-sulfates ( $[M - H]^-$ ,  $m/z$  calcd for  $C_7H_5O_7S$ : 232.98; found: 233). The peak  $m/z$  218 belongs to *p*-nitrophenyl sulfate.

### 2.3 2,3,4-Trihydroxybenzoic acid O-sulfates (THB-S)

mAU

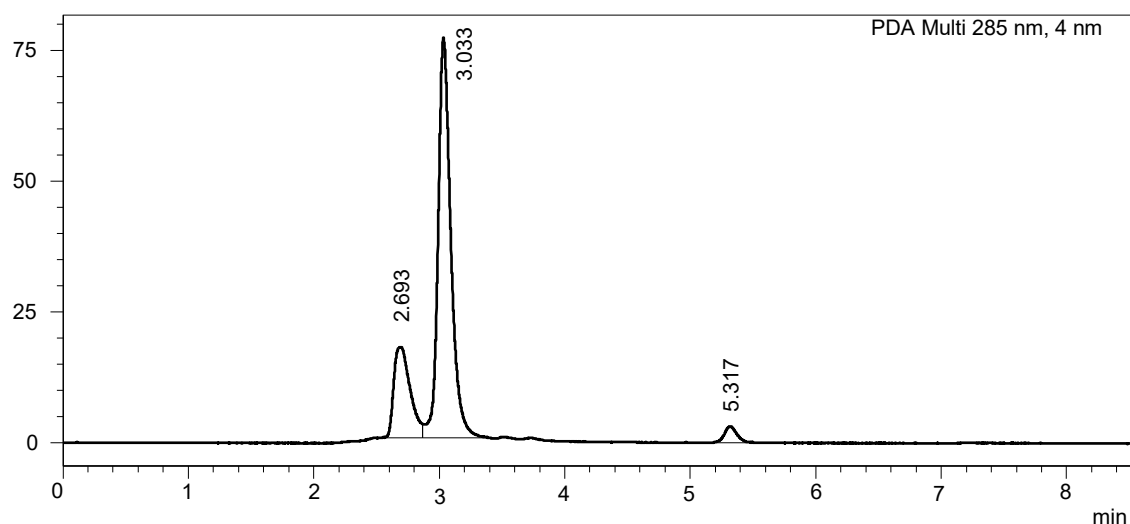

**Figure S5.** HPLC chromatogram of 2,3,4-trihydroxybenzoic acid O-sulfates (THB-S, regioisomers), method M1 (RT= 2.693 min and 3.033 min , 96% purity ). The peak at 5.317 min belongs to *p*NP-S.

**Table S10a.**  $^{13}C$  and  $^1H$  NMR data of the major 2,3,4-trihydroxybenzoic acid O-sulfate<sup>a</sup> (600.23 MHz for  $^1H$ , 150.93 MHz for  $^{13}C$ , DMSO- $d_6$ , 30 °C)

| Atom | $\delta_c$ [ppm] | <i>m</i> | $\delta_H$ [ppm] | <i>n</i> (H) | <i>m</i> | <i>J</i> [HZ] |
|------|------------------|----------|------------------|--------------|----------|---------------|
| 1    | 113.04           | S        | -                | 0            | -        | -             |
| 2    | 157.53           | S        | -                | 0            | -        | -             |
| 3    | 128.50           | S        | -                | 0            | -        | -             |
| 4    | 152.95           | S        | -                | 0            | -        | -             |
| 5    | 104.74           | D        | 6.068            | 1            | d        | 8.5           |



|    |        |   |       |   |   |     |
|----|--------|---|-------|---|---|-----|
| 6  | 126.10 | D | 7.325 | 1 | d | 8.5 |
| CO | 172.01 | S | -     | 0 | - | -   |

**Table S10b.**  $^{13}\text{C}$  and  $^1\text{H}$  NMR data of the minor 2,3,4-trihydroxybenzoic acid *O*-sulfate<sup>a</sup> (600.23 MHz for  $^1\text{H}$ , 150.93 MHz for  $^{13}\text{C}$ , DMSO- $d_6$ , 30 °C)

| Atom | $\delta_c$ [ppm] | $m$ | $\delta_H$ [ppm] | $n(\text{H})$ | $m$ | $J$ [HZ] |
|------|------------------|-----|------------------|---------------|-----|----------|
| 1    | 116.15           | S   | -                | 0             | -   | -        |
| 2    | 153.30           | S   | -                | 0             | -   | -        |
| 3    | 137.13           | S   | -                | 0             | -   | -        |
| 4    | 142.58           | S   | -                | 0             | -   | -        |
| 5    | 110.05           | D   | 6.428            | 1             | d   | 8.6      |
| 6    | 119.28           | D   | 7.082            | 1             | d   | 8.6      |
| CO   | 171.93           | S   | -                | 0             | -   | -        |

<sup>a</sup> ... the number and position of sulfate groups could not be unambiguously determined by NMR

molar ratio major sulfate : minor sulfate = 80 : 20

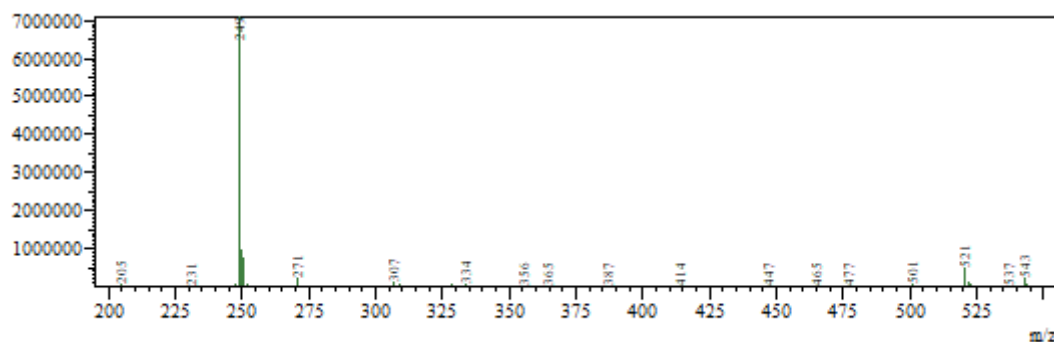

**Figure S6.** MS-ESI spectrum of 2,3,4-trihydroxybenzoic acid *O*-sulfate(  $[\text{M} - \text{H}]^-$ ;  $m/z$  calcd for  $\text{C}_7\text{H}_5\text{O}_8\text{S}$ : 248.98; found: 249).



## 2.4 Caffeic acid O-sulfates (CAF-S)

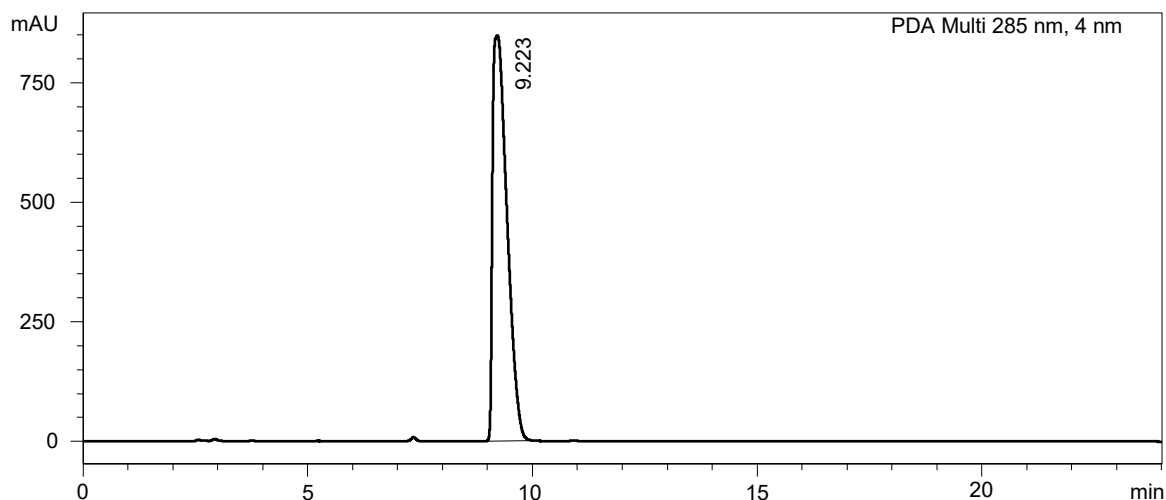

**Figure S7.** HPLC chromatogram of caffeic acid O-sulfates (CAF, regioisomers), method M2 (RT= 9.223 min, 99% purity)

**Table S11a.**  $^{13}\text{C}$  and  $^1\text{H}$  NMR data of caffeic acid 3-O-sulfate (600.23 MHz for  $^1\text{H}$ , 150.93 MHz for  $^{13}\text{C}$ , DMSO- $d_6$ , 30 °C)

| Atom | $\delta_c$ [ppm] | $m$ | $\delta_H$ [ppm] | $n(\text{H})$ | $m$ | $J$ [HZ]      |
|------|------------------|-----|------------------|---------------|-----|---------------|
| 1    | 126.53           | S   | -                | 0             | -   | -             |
| 2    | 121.72           | D   | 7.396            | 1             | d   | 2.2           |
| 3    | 141.10           | S   | -                | 0             | -   | -             |
| 4    | 150.62           | S   | -                | 0             | -   | -             |
| 5    | 117.23           | D   | 6.819            | 1             | d   | 8.3           |
| 6    | 124.82           | D   | 7.195            | 1             | ddd | 8.3, 2.2, 0.3 |
| 1'   | 169.39           | S   | -                | 0             | -   | -             |
| 2'   | 119.90           | D   | 6.191            | 1             | d   | 15.8          |
| 3'   | 140.84           | D   | 7.291            | 1             | d   | 15.8          |

$\delta$  - chemical shift,  $m$  – multiplicity,  $n$  – number of hydrogens,  $J$  – interaction constant

**Table S11b.**  $^{13}\text{C}$  and  $^1\text{H}$  NMR data of caffeic acid 4-O-sulfate (600.23 MHz for  $^1\text{H}$ , 150.93 MHz for  $^{13}\text{C}$ , DMSO- $d_6$ , 30 °C)

| Atom | $\delta_c$ [ppm] | $m$ | $\delta_H$ [ppm] | $n(\text{H})$ | $m$ | $J$ [HZ]      |
|------|------------------|-----|------------------|---------------|-----|---------------|
| 1    | 131.67           | S   | -                | 0             | -   | -             |
| 2    | 115.72           | D   | 7.028            | 1             | d   | 2.2           |
| 3    | 149.00           | S   | -                | 0             | -   | -             |
| 4    | 142.08           | S   | -                | 0             | -   | -             |
| 5    | 122.65           | D   | 7.162            | 1             | d   | 8.3           |
| 6    | 119.19           | D   | 6.969            | 1             | ddd | 8.3, 2.2, 0.3 |
| 1'   | 169.61           | S   | -                | 0             | -   | -             |





|    |        |   |       |   |   |      |
|----|--------|---|-------|---|---|------|
| 2' | 122.54 | D | 6.270 | 1 | d | 15.8 |
| 3' | 140.15 | D | 7.258 | 1 | d | 15.8 |

$\delta$  - chemical shift,  $m$  - multiplicity,  $n$  - number of hydrogens,  $J$  - interaction constant

ratio of 3-O-sulfate : 4-O-sulfate = 69 : 31

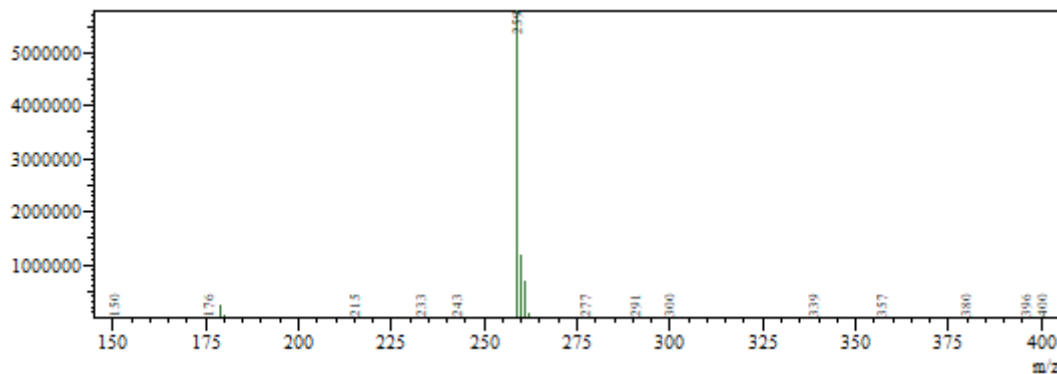

**Figure S8.** MS-ESI spectrum of caffeic acid O-sulfates ( $[M - H]^-$ ,  $m/z$  calcd for  $C_9H_7O_7S$ : 258.99; found: 259)

## 2.5 Catechol-1-O-sulfate (CAT-S)

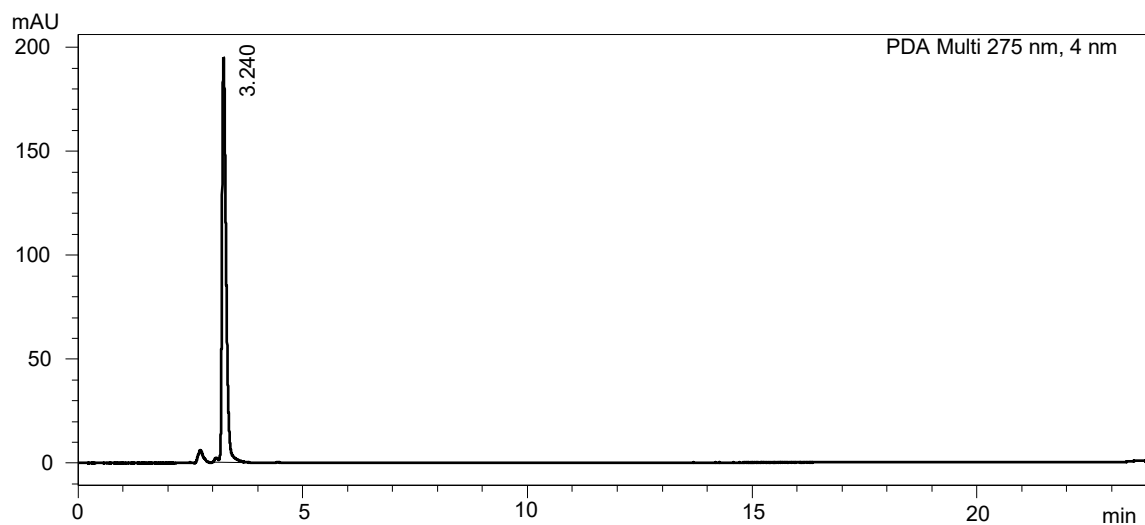

**Figure S9.** HPLC chromatogram of catechol-1-O-sulfate (Cat-S), method M1 (RT= 3.240 min, 96% purity)

**Table S12.**  $^{13}C$  and  $^1H$  NMR data of catechol-1-O-sulfate (399.87 MHz for  $^1H$ , 100.55 MHz for  $^{13}C$ , DMSO- $d_6$ , 30 °C)

| Atom | $\delta_c$ [ppm] | $m$ | $\delta_H$ [ppm] | $n(H)$ | $m$ | $J$ [HZ]      |
|------|------------------|-----|------------------|--------|-----|---------------|
| 1    | 140.87           | S   | -                | 0      | -   | -             |
| 2    | 149.16           | S   | -                | 0      | -   | -             |
| 3    | 117.16           | D   | 6.815            | 1      | dd  | 8.0, 1.7      |
| 4    | 124.79           | D   | 6.943            | 1      | ddd | 7.0, 7.3, 1.6 |



|   |        |   |       |   |     |               |
|---|--------|---|-------|---|-----|---------------|
| 5 | 119.27 | D | 6.737 | 1 | ddd | 8.0, 7.3, 1.7 |
| 6 | 123.07 | D | 7.109 | 1 | dd  | 8.0, 1.6      |

$\delta$  - chemical shift,  $m$  - multiplicity,  $n$  - number of hydrogens,  $J$  - interaction constant

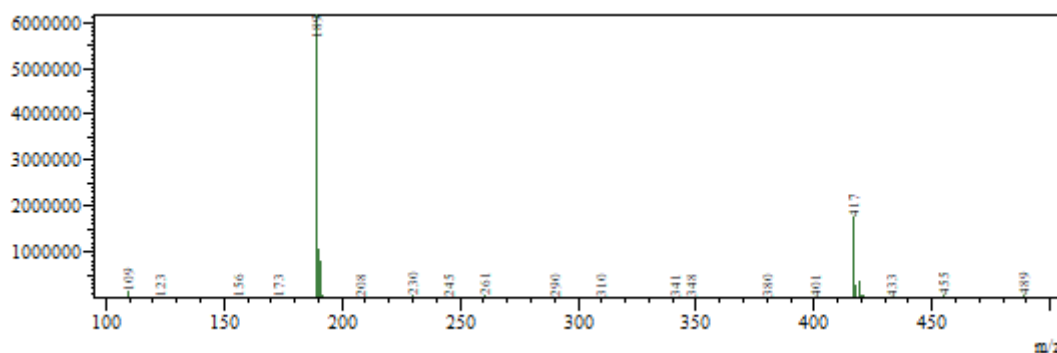

**Figure S10.** MS-ESI spectrum of catechol-1-O-sulfate([M - H]<sup>-</sup>;  $m/z$  calcd for C<sub>6</sub>H<sub>5</sub>O<sub>5</sub>S: 188.99; found: 189)

## 2.6 Phloroglucinol-O-sulfate (PG-S)

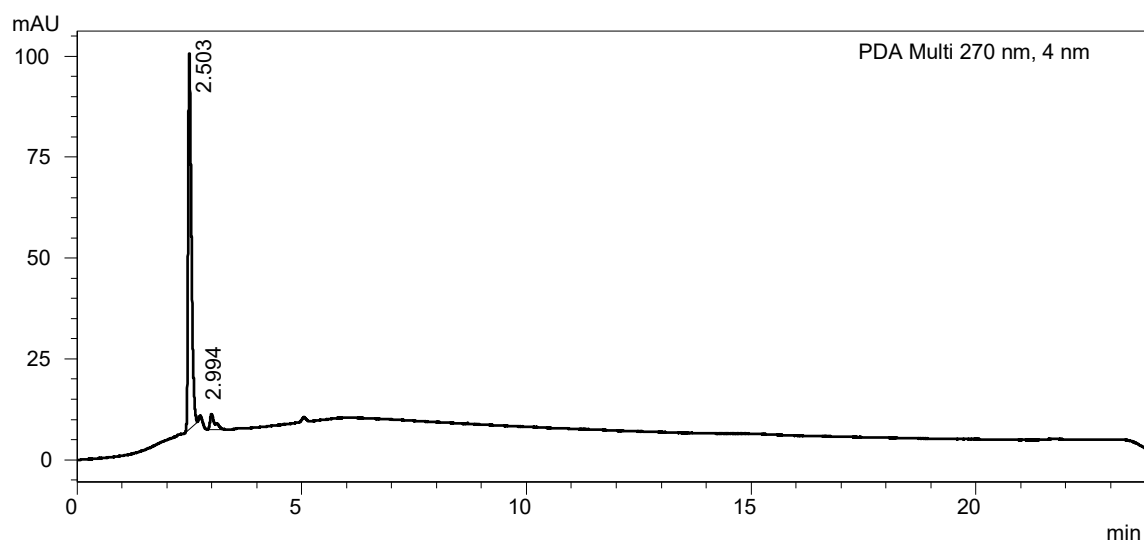

**Figure S11.** HPLC chromatogram of phloroglucinol-O-sulfate (PG-S), method M1 (RT= 2.503 min, 94% purity)

**Table S13.** <sup>13</sup>C and <sup>1</sup>H NMR data of phloroglucinol-O-sulfate (600.23 MHz for <sup>1</sup>H, 150.93 MHz for <sup>13</sup>C, DMSO-*d*<sub>6</sub>, 30 °C)

| Atom | $\delta_c$ [ppm] | $m$ | $\delta_H$ [ppm] | $n(H)$ | $m$ | $J$ [HZ] |
|------|------------------|-----|------------------|--------|-----|----------|
| 1    | 154.87           | S   | -                | 0      | -   | -        |
| 2, 6 | 98.87            | D   | 6.102            | 2      | d   | 2.2      |



|      |        |   |       |   |   |     |
|------|--------|---|-------|---|---|-----|
| 3, 5 | 158.00 | S | -     | 0 | - | -   |
| 4    | 97.50  | D | 5.881 | 1 | t | 2.2 |

$\delta$  - chemical shift,  $m$  – multiplicity,  $n$  – number of hydrogens,  $J$  – interaction constant

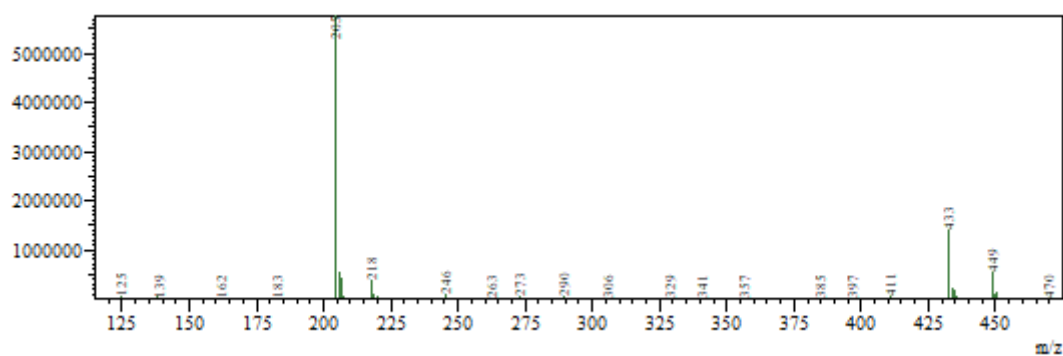

**Figure S12.** MS-ESI spectrum of phloroglucinol-*O*-sulfate ( $[M - H]^-$ ,  $m/z$  calcd for  $C_6H_5O_6S$ : 204.99; found: 205)



### 3 RETENTION TIMES, WIDTHS OF THE PEAKS AND ABSORPTION MAXIMA OF THE COMPOUNDS

#### 3.1 Methods without buffer in the mobile phase

**Table S1:** Retention times ( $t_R$ ), peak widths ( $w_{0.05}$ ), and maximum absorption wavelengths ( $\lambda_{max}$ ) for analytes measured separately by method **M3** (mobile phases: A= 0.1% TFA , B= 100% MeOH), stationary phase PFP

| Analyte       | $t_R$ [min]               | $w_{0.05}^a$ [min] | $\lambda_{max}$ [nm] |
|---------------|---------------------------|--------------------|----------------------|
| QUE           | 17.470                    | 0.554              | 250, 264, 365        |
| QUE-S         | 15.084                    | 0.632              | 250, 264, 365        |
| QUE-SS        | 11.084                    | 1.703              | 250, 264, 365        |
| AMP           | 6.062                     | 0.314              | 291                  |
| AMP-S         | 7.449                     | 0.437              | 291                  |
| LUT           | 20.010                    | 0.422              | 268, 332             |
| LUT-S         | 16.741                    | 0.501              | 268, 332             |
| LUT-SS        | 13.595                    | 1.426              | 268, 332             |
| MYR           | 14.014                    | 0.410              | 253, 372             |
| MYR-S         | 15.877                    | 0.542              | 253, 372             |
| MYR-SS        | 12.497                    | 1.398              | 253, 372             |
| MeCAT         | 16.713                    | 0.582              | 276                  |
| MeCAT-S       | 12.519                    | 0.738              | 276                  |
| ISQ           | 9.615                     | 0.312              | 255, 354             |
| ISQ-S         | 8.247                     | 0.381              | 265, 337             |
| RUT           | 9.156                     | 0.322              | 256, 355             |
| RUT-SS        | 7.175, 7.399 <sup>b</sup> | n.d. <sup>c</sup>  | 266, 338             |
| TAX           | 7.767                     | 0.466              | 286                  |
| TAX-S         | 7.557                     | 0.368              | 286                  |
| <i>p</i> NP   | 13.414                    | 0.367              | 218, 314             |
| <i>p</i> NP-S | 6.751                     | 0.295              | 281                  |

<sup>a</sup>  $w_{0.05}$  is the width of the peak in 5% of its height; <sup>b</sup> partial separation of sulfated regioisomers; <sup>c</sup> the peak shape did not allow the determination of  $w_{0.05}$



**Table S2:** Retention times ( $t_R$ ), peak widths ( $w_{0.05}$ ), and maximum absorption wavelengths ( $\lambda_{max}$ ) for analytes measured separately by method **M6** (mobile phases: A= 5% acetonitrile, 0.1% HCOOH, B= 80% acetonitrile, 0.1% HCOOH), stationary phase C18

| Analyte       | $t_R$ [min]               | $w_{0.05}^a$ [min] | $\lambda_{max}$ [nm] |
|---------------|---------------------------|--------------------|----------------------|
| DHSCH         | 6.957                     | 0.101              | 256, 374             |
| DHSCH-S       | 6.771                     | 0.478              | 256, 372             |
| DHSB          | 7.039                     | 0.177              | 256, 374             |
| DHSB-S        | 6.771                     | 0.608              | 254, 367             |
| DHSB-SS       | 3.180                     | 1.701              | 255, 369             |
| SCH           | 5.753                     | 0.156              | 286                  |
| SCH-S         | 4.985                     | 0.393              | 286                  |
| SB            | 4.141, 4.225 <sup>b</sup> | n.d. <sup>c</sup>  | 286                  |
| SB-S          | 3.165                     | 0.981              | 286                  |
| CAF           | 3.087                     | 0.211              | 217, 234, 324        |
| CAF-S         | 5.847                     | 2.555              | 215, 297, 307        |
| CAT           | 2.317                     | 0.246              | 225, 274             |
| CAT-S         | 5.109                     | 2.564              | 225, 267             |
| PRO           | 1.822                     | 0.237              | 230, 272, 296        |
| PRO-S         | 4.697                     | 2.579              | 220, 254             |
| THB           | 2.058                     | 0.259              | 255, 264             |
| THB-S         | 0.718                     | 0.050              | 255, 279             |
| MeCAT         | 3.769                     | 0.300              | 217, 277             |
| MeCAT-S       | 6.578                     | 2.546              | 218, 276             |
| PG            | 1.039                     | 0.197              | 269                  |
| PG-S          | 2.683                     | 1.534              | 270                  |
| <i>p</i> NP   | 5.031                     | 0.221              | 218, 314             |
| <i>p</i> NP-S | 0.796                     | 0.140              | 281                  |

<sup>a</sup>  $w_{0.05}$  is the width of the peak in 5% of its height; <sup>b</sup> partial separation of stereoisomers A and B; <sup>c</sup> the peak shape did not allow the determination of  $w_{0.05}$



**Table S3:** Retention times ( $t_R$ ), peak widths ( $w_{0.05}$ ), and maximum absorption wavelengths ( $\lambda_{max}$ ) for analytes measured separately by method **M7** (mobile phases: A=5% acetonitrile, 0.1% HCOOH, mobile phase B= 80% AcN, 0.1% HCOOH), stationary phase C18-Polar

| Analyte       | $t_R$ [min] | $w_{0.05}^a$ [min] | $\lambda_{max}$ [nm] |
|---------------|-------------|--------------------|----------------------|
| DHSB          | 9.032       | 0.143              | 256, 374             |
| DHSB-S        | 7.904       | 0.234              | 254, 367             |
| DHSB-SS       | 8.490       | 0.146              | 255, 369             |
| DHSCH         | 7.573       | 0.125              | 256, 374             |
| DHSCH-S       | 6.768       | 0.322              | 256, 373             |
| SCH           | 7.413       | 0.132              | 287                  |
| SCH-S         | 6.313       | 0.395              | 287                  |
| SB            | 7.410       | 0.186              | 287                  |
| SB-S          | 6.555       | 0.186              | 287                  |
| CAF           | 5.987       | 0.270              | 217, 234, 324        |
| CAF-S         | 5.366       | 1.040              | 215, 231, 308        |
| PRO           | 3.653       | 0.471              | 230, 272, 296        |
| PRO-S         | 2.500       | 0.920              | 220, 254             |
| THB           | 4.122       | 0.383              | 225, 264             |
| THB-S         | 2.966       | 0.582              | 256, 294             |
| CAT           | 4.331       | 0.403              | 273                  |
| CAT-S         | 7.627       | 0.305              | 273                  |
| MeCAT         | 6.302       | 0.261              | 220, 283             |
| MeCAT-S       | 5.536       | 0.507              | 220, 275             |
| PG            | 1.641       | 0.310              | 269                  |
| PG-S          | 1.265       | 0.308              | 270                  |
| <i>p</i> NP   | 7.274       | 0.278              | 218, 314             |
| <i>p</i> NP-S | 5.567       | 0.621              | 281                  |

<sup>a</sup>  $w_{0.05}$  is the width of the peak in 5% of its height



### 3.2 Methods with ammonium acetate buffer in the mobile phase

**Table S4:** Retention times ( $t_R$ ), peak widths ( $w_{0.05}$ ), and maximum absorption wavelengths ( $\lambda_{max}$ ) for analytes measured separately by method **M1** (mobile phases: A= 10 mM ammonium acetate, 0.1% HCOOH, mobile phase B= 100% MeOH), stationary phase PFP

| Analyte | $t_R$ [min]                 | $w_{0.05}^a$ [min] | $\lambda_{max}$ [nm] |
|---------|-----------------------------|--------------------|----------------------|
| QUE     | 16.127                      | 0.385              | 251, 264, 360        |
| QUE-S   | 12.139                      | 0.397              | 251, 264, 362        |
| QUE-SS  | 6.014                       | 0.642              | 249, 265, 366        |
| AMP     | 5.480                       | 0.519              | 290                  |
| AMP-S   | 6.007                       | 0.352              | 290                  |
| LUT     | 17.916                      | 0.427              | 254, 349             |
| LUT-S   | 13.340                      | 0.377              | 268, 330             |
| LUT-SS  | 12.830                      | 0.362              | 268, 336             |
| MYR     | 12.716                      | 0.390              | 253, 316, 369        |
| MYR-S   | 8.566                       | 0.478              | 267, 316, 357        |
| MYR-SS  | 4.602                       | 0.400              | 253, 316, 371        |
| CAT     | 4.578                       | 0.256              | 212, 276             |
| CAT-S   | 3.240                       | 0.207              | 212, 271             |
| MeCAT   | 5.978                       | 0.335              | 275                  |
| MeCAT-S | 4.112                       | 0.249              | 275                  |
| DHSB    | 19.094                      | 1.030              | 254, 366             |
| DHSB-S  | 17.385                      | 0.347              | 255, 369             |
| DHSB-SS | 8.280                       | 0.525              | 254, 347             |
| DHSCH   | 17.010                      | 0.425              | 256, 373             |
| DHSCH-S | 12.060                      | 0.576              | 256, 370             |
| SB      | 15.202, 15.521 <sup>c</sup> | n.d. <sup>b</sup>  | 288                  |
| SB-S    | 13.728, 14.479 <sup>d</sup> | 0.287, 0.415       |                      |
| SCH     | 12.449, 13.285 <sup>c</sup> | 0.299, 0.312       | 288                  |
| SCH-S   | 6.176, 6.654 <sup>d</sup>   | 0.338              | 288                  |
| CAF     | 5.150                       | 0.238              | 217, 234, 324        |
| CAF-S   | 3.720                       | 0.267              | 213, 227, 294        |
| PRO     | 3.721                       | 0.270              | 262, 296             |
| PRO-S   | 2.990                       | 0.225              | 250                  |
| THB     | 3.568                       | 0.246              | 261                  |
| THB-S   | 2.693, 3.033 <sup>d</sup>   | 0.329, 0.266       | 252, 293             |
| PG      | 2.906                       | 0.205              | 299                  |
| PG-S    | 2.503                       | 0.177              | 271                  |
| ISQ     | 9.397                       | 0.344              | 256, 355             |
| ISQ-S   | 6.681                       | 0.311              | 266, 337             |
| RUT     | 8.869                       | 0.342              | 256, 355             |
| RUT-SS  | 6.055                       | 0.261              | 266, 338             |
| TAX     | 7.380                       | 0.285              | 288                  |
| TAX-S   | 5.582                       | 0.321              | 289                  |
| pNP     | 11.528                      | 0.338              | 218, 314             |



| Analyte       | $t_R$ [min] | $w_{0.05}^a$ [min] | $\lambda_{max}$ [nm] |
|---------------|-------------|--------------------|----------------------|
| <i>p</i> NP-S | 4.930       | 0.457              | 280                  |

<sup>a</sup>  $w_{0.05}$  is the width of the peak in 5% of its height; <sup>b</sup> n.d. means that the peak shape did not allow the determination of  $w_{0.05}$ ; <sup>c</sup> partial separation of stereoisomers A and B; <sup>d</sup> partial separation of sulfated regioisomers

**Table S5:** Retention times ( $t_R$ ), peak widths ( $w_{0.05}$ ), and maximum absorption wavelengths ( $\lambda_{max}$ ) for analytes measured separately by method **M2** (mobile phases: A= 10 mM ammonium acetate, 0.1% HCOOH, mobile phase B= 100% MeOH), stationary phase PFP

| Analyte       | $t_R$ [min] | $w_{0.05}^a$ [min] | $\lambda_{max}$ [nm] |
|---------------|-------------|--------------------|----------------------|
| CAF           | 12.527      | 0.356              | 216, 235, 323        |
| CAF-S         | 9.233       | 0.671              | 216, 294, 308        |
| CAT           | 7.453       | 0.350              | 215, 273             |
| CAT-S         | 4.938       | 0.386              | 215, 270             |
| PRO           | 7.213       | 0.337              | 257, 293             |
| PRO-S         | 5.541       | 0.403              | 220, 254             |
| THB           | 6.240       | 0.368              | 260                  |
| THB-S         | 4.949       | 0.317              | 252, 293             |
| MeCAT         | 11.944      | 0.508              | 278                  |
| MeCAT-S       | 7.910       | 0.524              | 276                  |
| PG            | 4.004       | 0.235              | 266                  |
| PG-S          | 3.339       | 0.266              | 270                  |
| <i>p</i> NP   | 20.542      | 0.385              | 218, 314             |
| <i>p</i> NP-S | 10.401      | 0.498              | 280                  |

<sup>a</sup>  $w_{0.05}$  is the width of the peak in 5% of its height





**Table S6:** Retention times ( $t_R$ ), peak widths ( $w_{0.05}$ ), and maximum absorption wavelengths ( $\lambda_{max}$ ) for analytes measured separately by method **M5** (mobile phases: A= 10 mM ammonium acetate, 0.1% HCOOH, mobile phase B= 100% MeOH), stationary phase C18

| Analyte       | $t_R$ [min]               | $w_{0.05}^a$ [min] | $\lambda_{max}$ [nm] |
|---------------|---------------------------|--------------------|----------------------|
| DHSB          | 7.293                     | 0.146              | 254, 368             |
| DHSB-S        | 6.914                     | 0.189              | 254, 368             |
| DHSB-SS       | 6.097                     | 0.392              | 254, 346             |
| DHSCH         | 6.691                     | 0.108              | 256, 374             |
| DHSCH-S       | 6.258                     | 0.177              | 256, 346             |
| SCH           | 6.002                     | n.d. <sup>b</sup>  | 287                  |
| SCH-S         | 5.552                     | n.d. <sup>b</sup>  | 287                  |
| SB            | 6.480, 6.514 <sup>c</sup> | n.d. <sup>b</sup>  | 287                  |
| SB-S          | 6.487, 6.579 <sup>f</sup> | n.d. <sup>b</sup>  | 287                  |
| CAF           | 4.954                     | 0.102              | 218, 235, 323        |
| CAF-S         | 4.326, 4.494 <sup>d</sup> | n.d. <sup>b</sup>  | 229, 293             |
| CAT           | 2.920                     | 0.356              | 273                  |
| CAT-S         | 4.290                     | n.d. <sup>b</sup>  | 279                  |
| PRO           | 2.816                     | 0.410              | 226, 258, 292        |
| PRO-S         | 2.104                     | 0.276              | 254                  |
| THB           | 1.944                     | 0.175              | 231, 257             |
| THB-S         | n.d. <sup>e</sup>         | -                  | 252, 293             |
| MeCAT         | 4.946                     | 0.226              | 221, 274             |
| MeCAT-S       | 4.362 <sup>d</sup>        | n.d. <sup>b</sup>  | 221, 274             |
| PG            | 1.180                     | 0.288              | 266                  |
| PG-S          | 1.465                     | 0.567              | 276                  |
| <i>p</i> NP   | 5.609                     | 0.169              | 218, 314             |
| <i>p</i> NP-S | 5.216                     | 0.900              | 280                  |

<sup>a</sup>  $w_{0.05}$  is the width of the peak in 5% of its height; <sup>b</sup>n.d. means, that the peak shape did not allow the determination of  $w_{0.05}$ ; <sup>c</sup> partial separation of stereoisomers A and B; <sup>d</sup> partial separation of sulfated regioisomers; <sup>e</sup> the compound was decomposed during the analysis, only parent compound without sulfate was detected; <sup>f</sup> separation of sulfated stereoisomers A and B



**Table S7:** Retention times ( $t_R$ ), peak widths ( $w_{0.05}$ ), and maximum absorption wavelengths ( $\lambda_{max}$ ) for analytes measured separately by method **M4** (mobile phases: A= 10 mM ammonium acetate, 0.1% HCOOH, mobile phase B= 100% MeOH), stationary phase ZICpHILIC

| Analyte       | $t_R$ [min]                      | $w_{0.05}^a$ [min] | $\lambda_{max}$ [nm] |
|---------------|----------------------------------|--------------------|----------------------|
| DHSB          | 1.160                            | 0.251              | 255, 360             |
| DHSB-S        | 3.636                            | 0.849              | 254, 367             |
| DHSB-SS       | 8.853                            | 0.588              | 253, 346             |
| DHSCH         | 2.025                            | 1.209              | 256, 373             |
| DHSCH-S       | 5.448                            | 0.465              | 256, 373             |
| SCH           | 3.047                            | 1.210              | 287                  |
| SCH-S         | 6.332                            | 0.540              | 286                  |
| SB            | 1.094                            | 0.647              | 287                  |
| SB-S          | 2.470, 3.007, 4.365 <sup>c</sup> | n.d. <sup>b</sup>  |                      |
| CAF           | 2.540                            | 0.660              | 217, 239, 295, 322   |
| CAF-S         | 4.194                            | 0.528              | 213, 295, 307        |
| CAT           | 1.257                            | 1.348              | 230, 273             |
| CAT-S         | n.d. <sup>d</sup>                | -                  |                      |
| PRO           | 3.184                            | 0.787              | 254, 291             |
| PRO-S         | 6.255                            | 0.558              | 253                  |
| THB           | 4.456                            | 0.638              | 231, 265             |
| THB-S         | n.d. <sup>d</sup>                | -                  |                      |
| MeCAT         | 0.963                            | n.d. <sup>b</sup>  | 221, 255             |
| MeCAT-S       | 1.049                            | 0.314              | 217, 293             |
| PG            | 4.641                            | 0.430              | 268                  |
| PG-S          | 9.500                            | 0.732              | 271                  |
| <i>p</i> NP   | 0.984                            | 0.273              | 218, 312             |
| <i>p</i> NP-S | 1.494                            | 0.600              | 280                  |

<sup>a</sup>  $w_{0.05}$  is the width of the peak in 5% of its height; <sup>b</sup>n.d. means, that the peak shape did not allow the determination of  $w_{0.05}$ ; <sup>c</sup> partial separation of sulfated stereoisomers; <sup>d</sup> the compound was decomposed during the analysis, only parent compound without sulfate was detected

#### 4 COMPARISON OF HPLC CHROMATOGRAMS FOR INDIVIDUAL COMPOUNDS

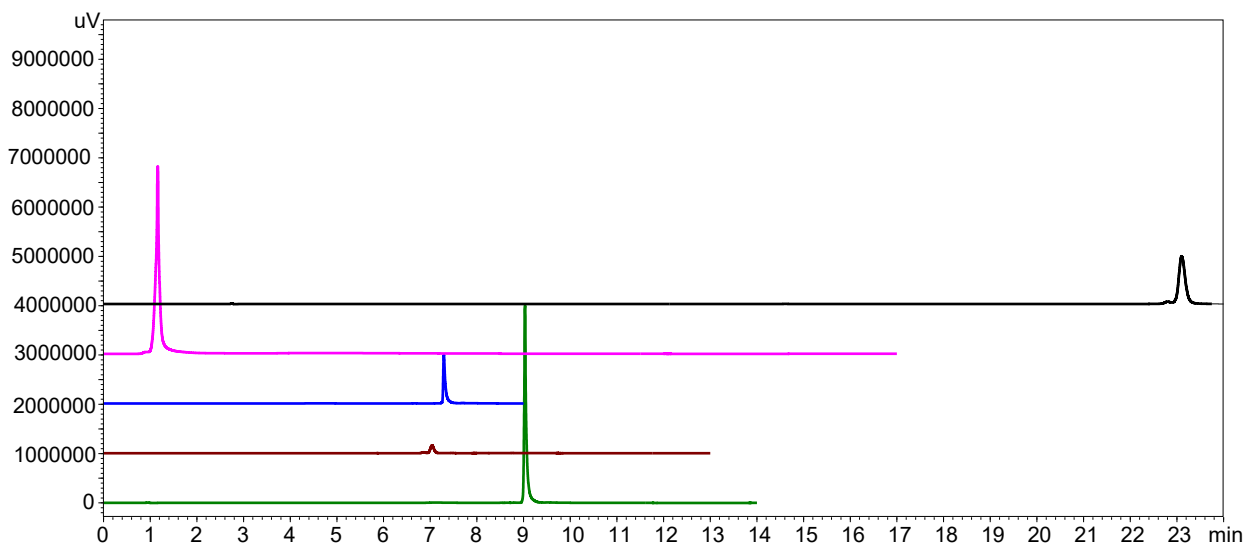

**Figure S13:** Comparison of HPLC chromatograms of **DHSB** in various methods ( $\lambda_{\text{max}} = 360$  nm). Method M1 in black, method M4 in pink, method M5 in blue, method M6 in brown, method M7 in green.

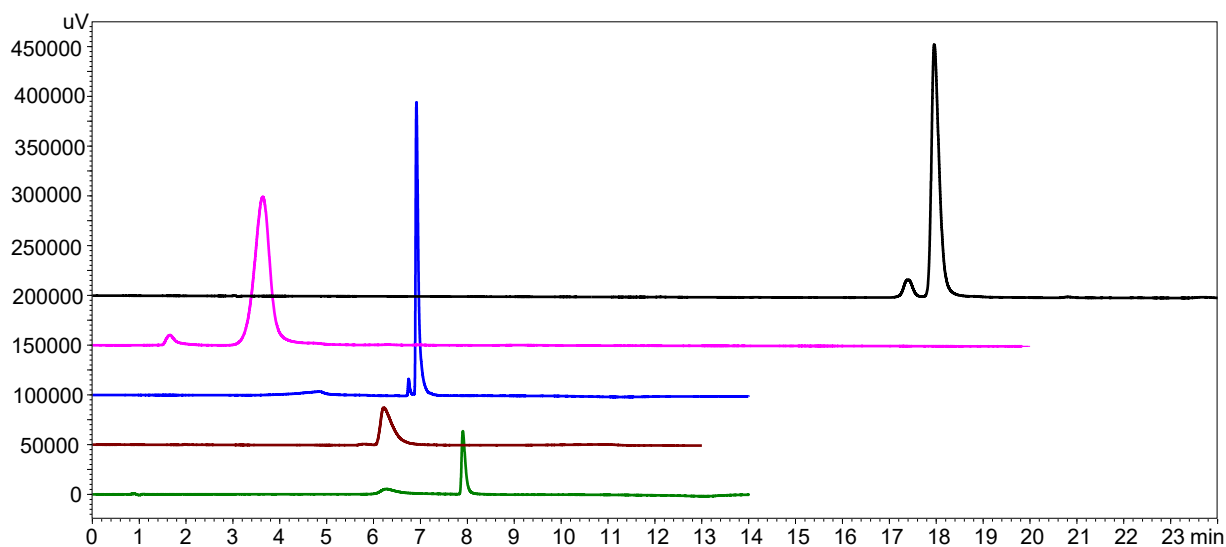

**Figure S14:** Comparison of HPLC chromatograms of **DHSB-S** in various methods ( $\lambda_{\text{max}} = 360$  nm). Method M1 in black, method M4 in pink, method M5 in blue, method M6 in brown, method M7 in green.

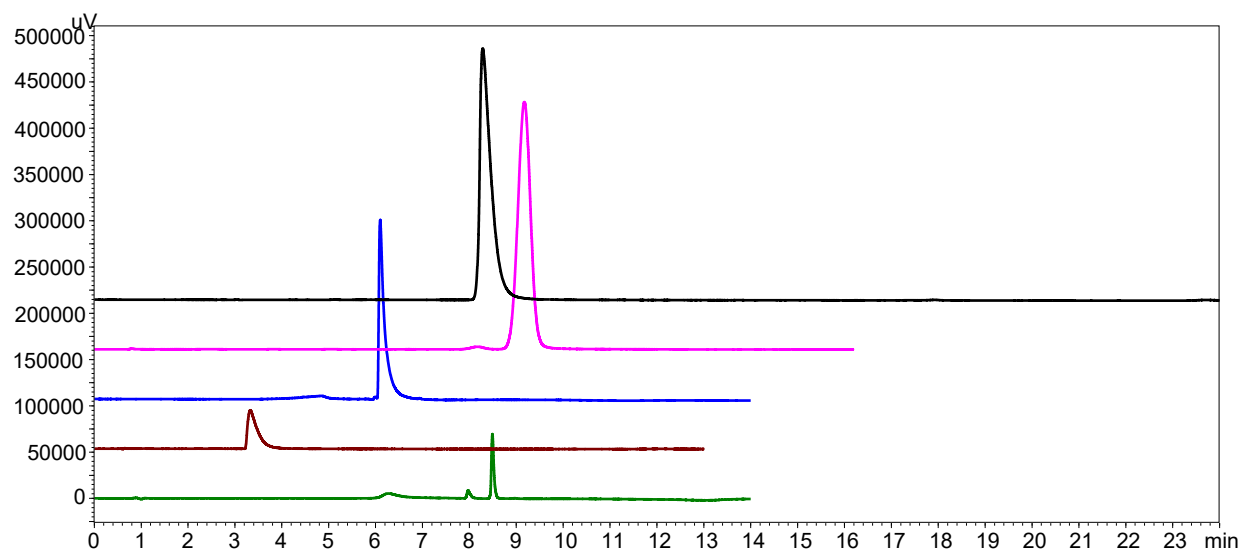

**Figure S15:** Comparison of HPLC chromatograms of **DHSB-SS** in various methods ( $\lambda_{\text{max}} = 360$  nm). Method M1 in black, method M4 in pink, method M5 in blue, method M6 in brown, method M7 in green.

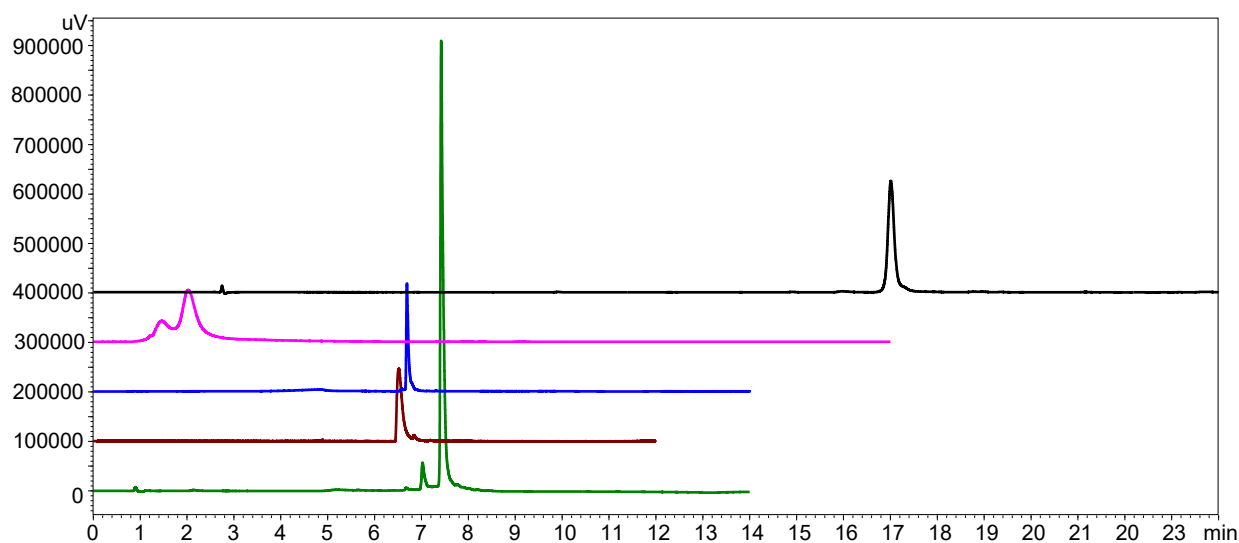

**Figure S16:** Comparison of HPLC chromatograms of **DHSCH** in various methods ( $\lambda_{\text{max}} = 360$  nm). Method M1 in black, method M4 in pink, method M5 in blue, method M6 in brown, method M7 in green.

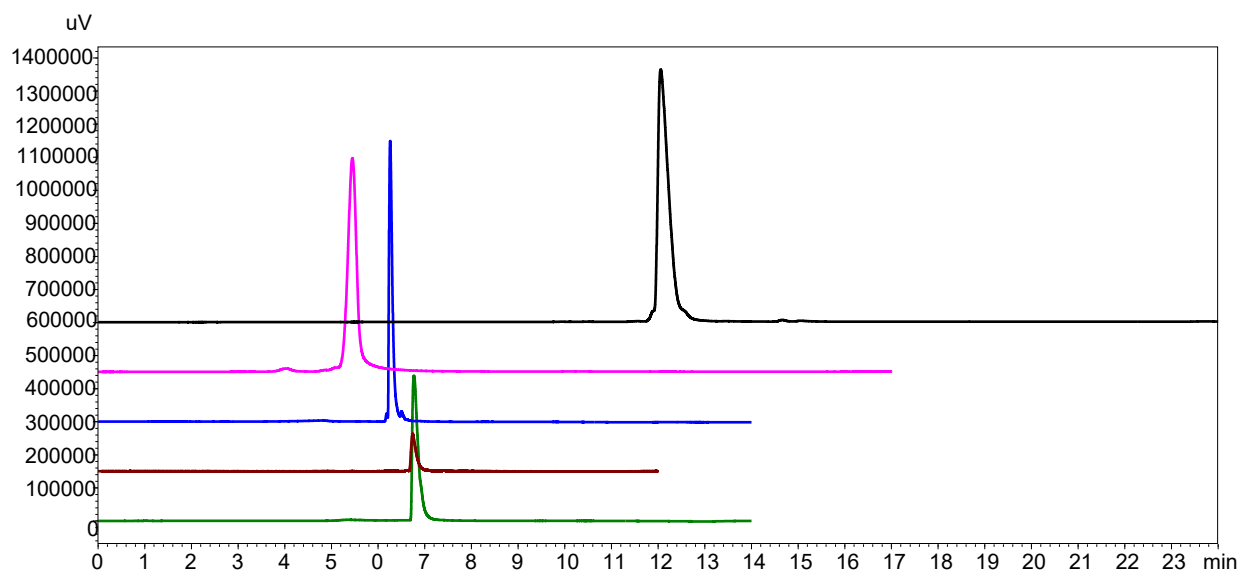

**Figure S17:** Comparison of HPLC chromatograms of **DHSCH-S** in various methods ( $\lambda_{\text{max}} = 360$  nm). Method M1 in black, method M4 in pink, method M5 in blue, method M6 in brown, method M7 in green.

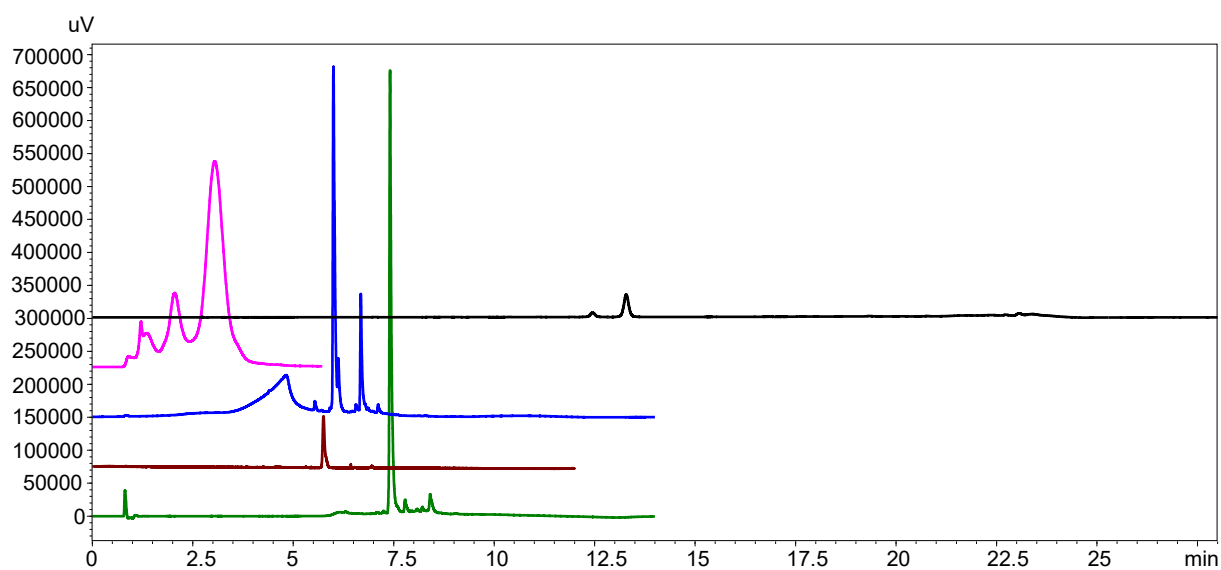

**Figure S18:** Comparison of HPLC chromatograms of **SCH** in various methods ( $\lambda_{\text{max}} = 285$  nm). Method M1 in black, method M4 in pink, method M5 in blue, method M6 in brown, method M7 in green.

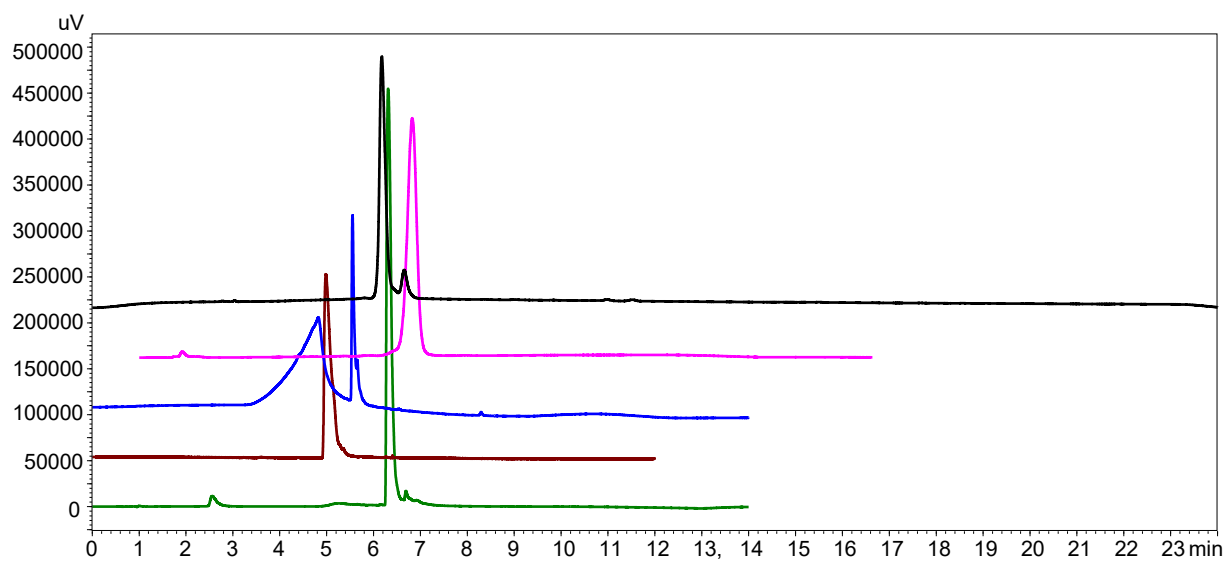

**Figure S19:** Comparison of HPLC chromatograms of **SCH-S** in various methods ( $\lambda_{\text{max}} = 285$  nm). Method M1 in black, method M4 in pink, method M5 in blue, method M6 in brown, method M7 in green. Pink chromatogram is shifted by one minute for greater clarity.

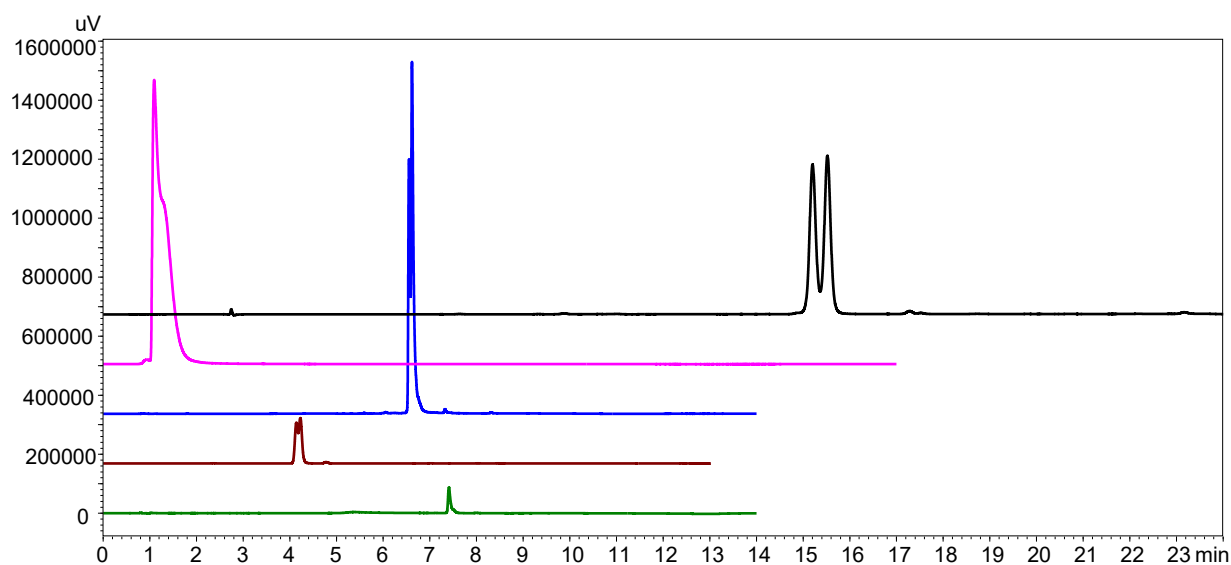

**Figure S20:** Comparison of HPLC chromatograms of **SB** in various methods ( $\lambda_{\text{max}} = 285$  nm). Method M1 in black, method M4 in pink, method M5 in blue, method M6 in brown, method M7 in green.

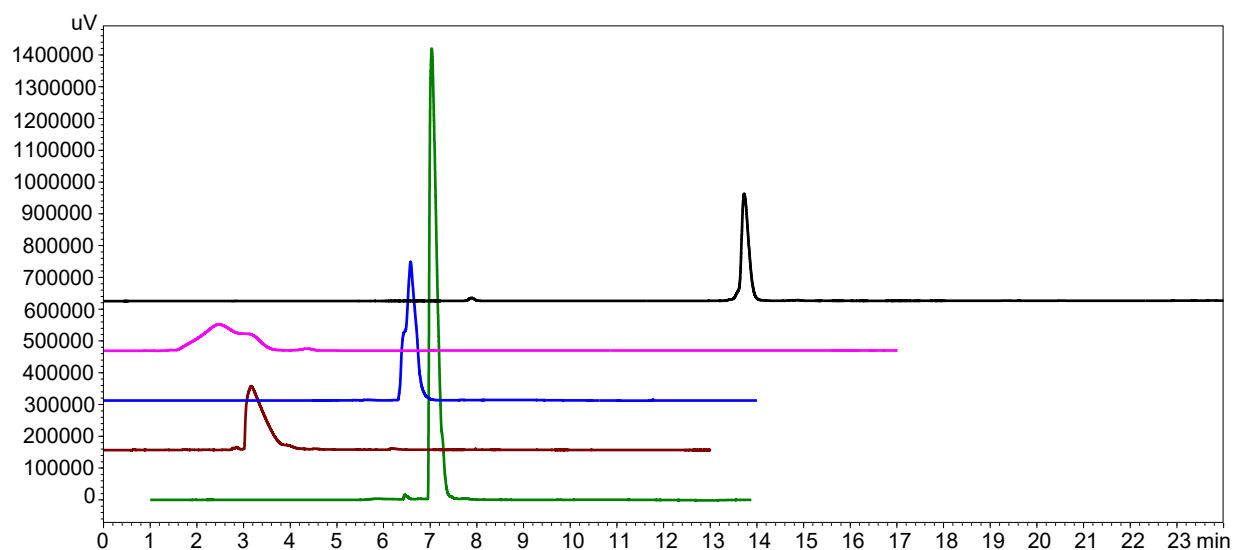

**Figure S21:** Comparison of HPLC chromatograms of **SB-S** in various methods ( $\lambda_{\text{max}} = 285$  nm). Method M1 in black, method M4 in pink, method M5 in blue, method M6 in brown, method M7 in green. Green chromatogram is shifted by one minute for greater clarity.

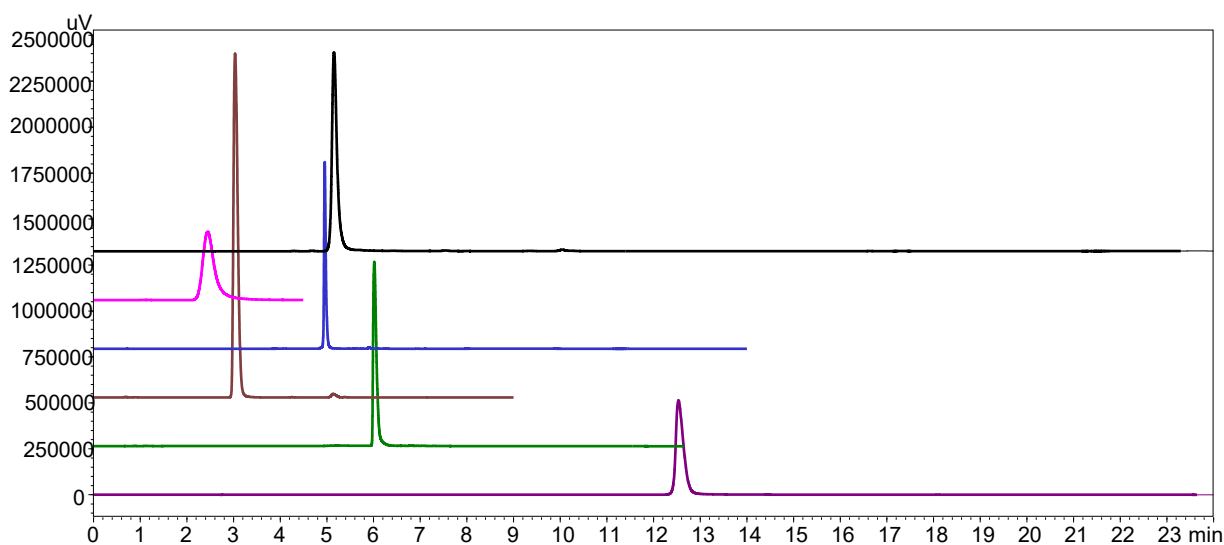

**Figure S22:** Comparison of HPLC chromatograms of **CAF** in various methods ( $\lambda_{\text{max}} = 324$  nm). Method M1 in black, method M2 in purple, method M4 in pink, method M5 in blue, method M6 in brown, method M7 in green.

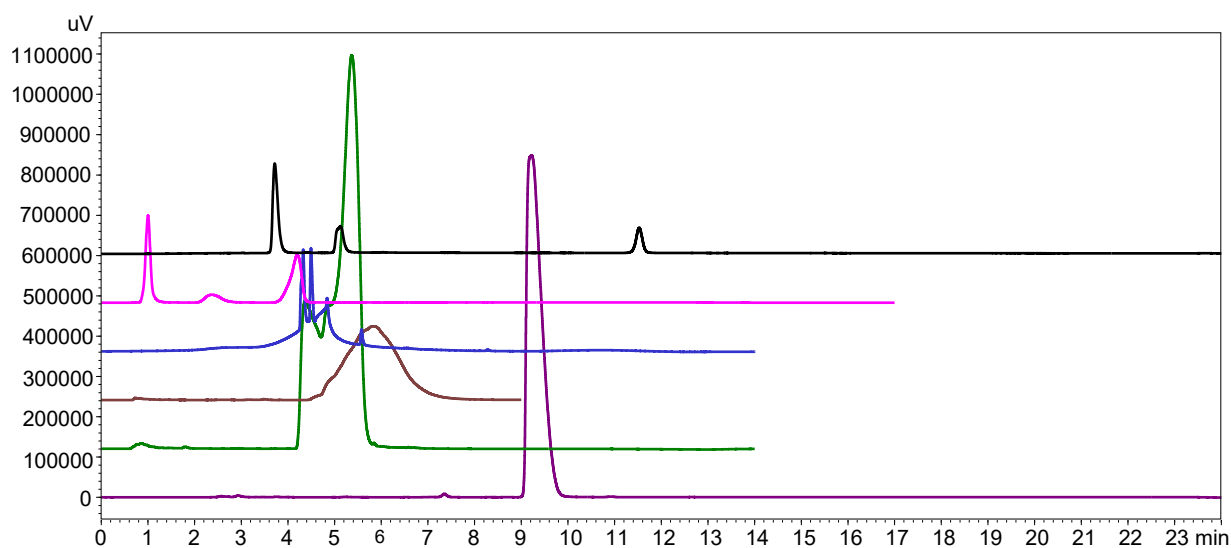

**Figure S23:** Comparison of HPLC chromatograms of **CAF-S** in various methods ( $\lambda_{\text{max}} = 285$  nm). Method M1 in black, method M2 in purple, method M4 in pink, method M5 in blue, method M6 in brown, method M7 in green.

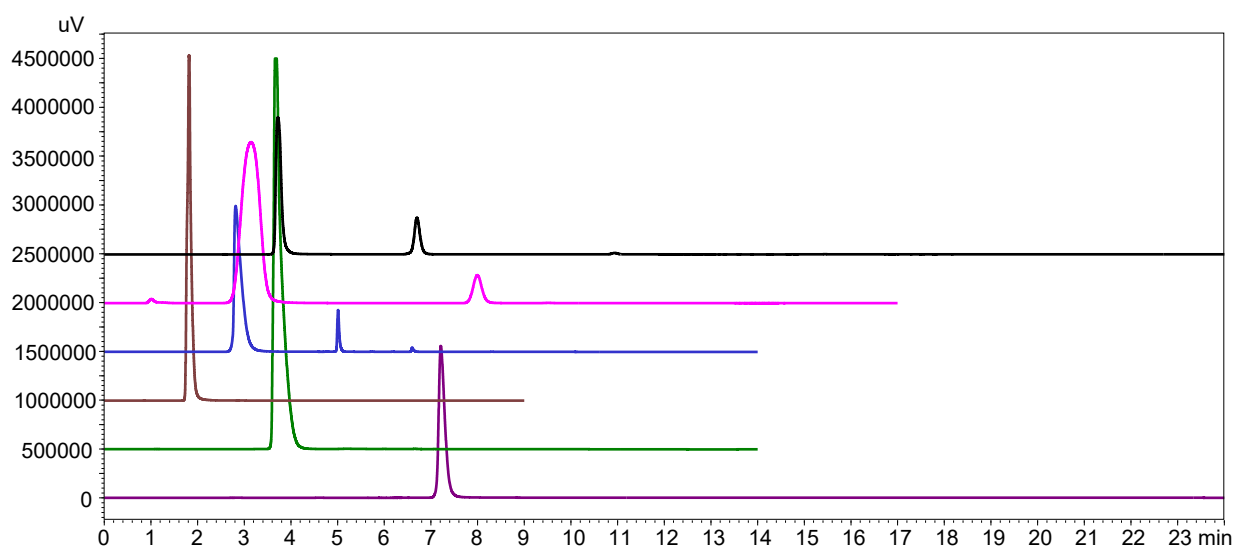

**Figure S24:** Comparison of HPLC chromatograms of **PRO** in various methods ( $\lambda_{\text{max}} = 285$  nm). Method M1 in black, method M2 in purple, method M4 in pink, method M5 in blue, method M6 in brown, method M7 in green.



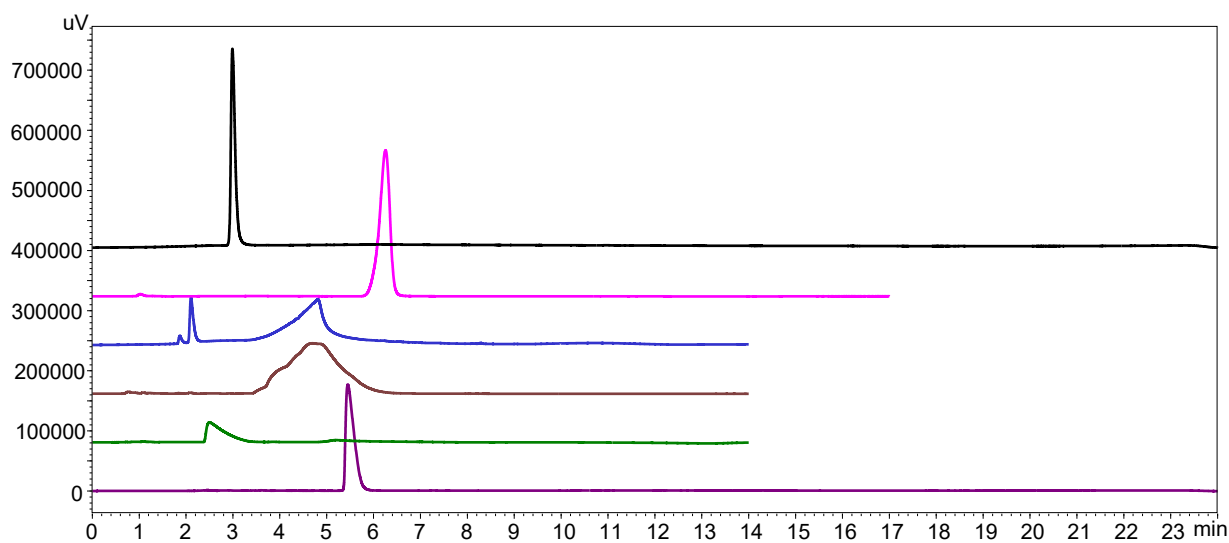

**Figure S25:** Comparison of HPLC chromatograms of **PRO-S** in various methods ( $\lambda_{\text{max}} = 250$  nm). Method M1 in black, method M2 in purple, method M4 in pink, method M5 in blue, method M6 in brown, method M7 in green.

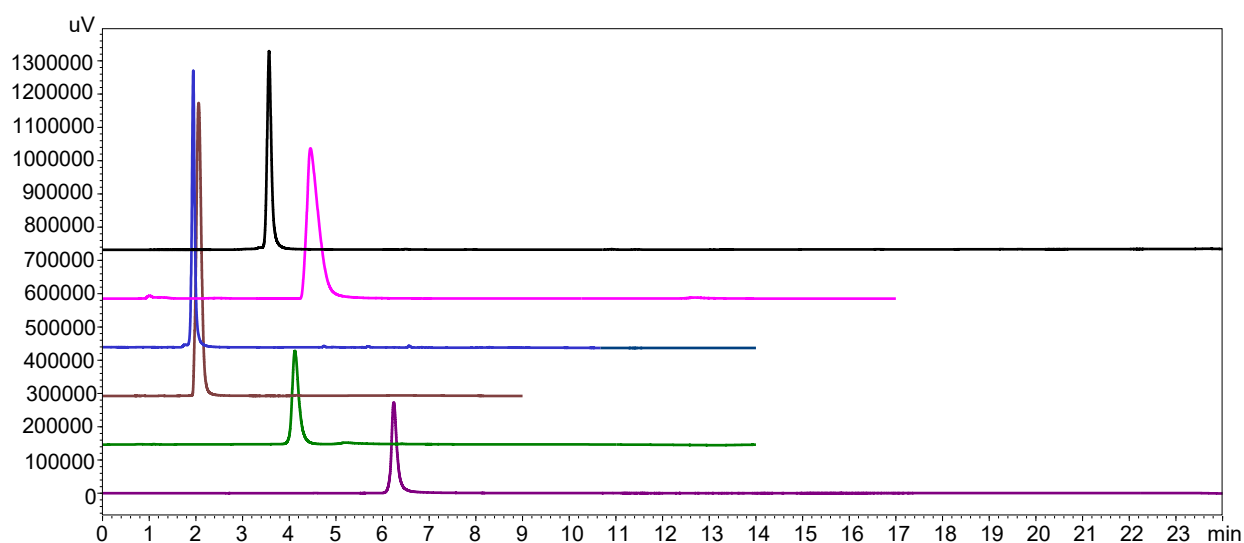

**Figure S26:** Comparison of HPLC chromatograms of **THB** in various methods ( $\lambda_{\text{max}} = 260$  nm). Method M1 in black, method M2 in purple, method M4 in pink, method M5 in blue, method M6 in brown, method M7 in green.

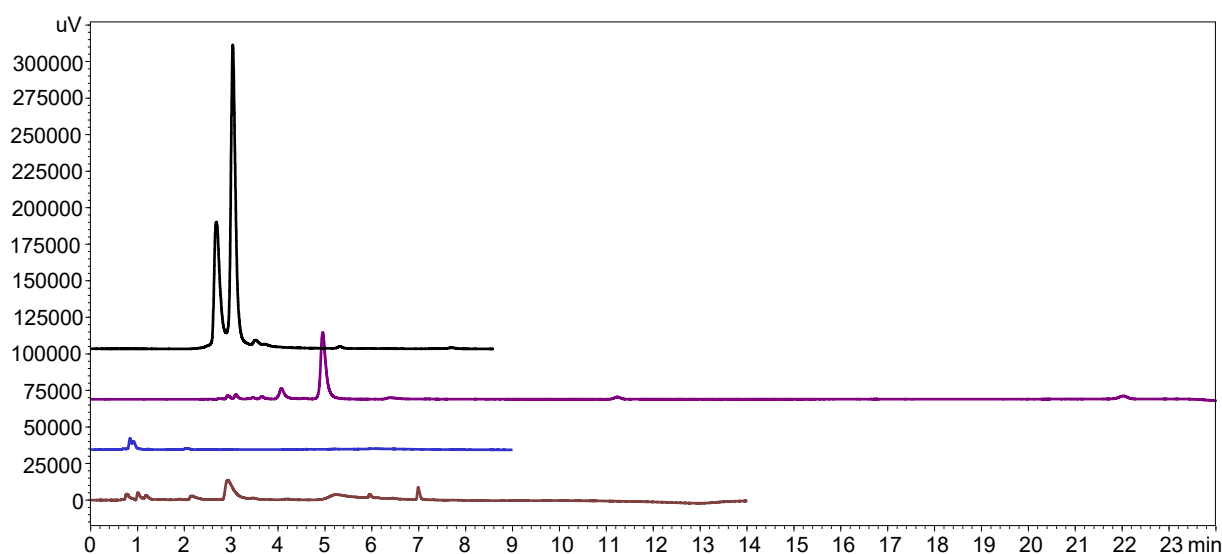

**Figure S27:** Comparison of HPLC chromatograms of **THB-S** in various methods ( $\lambda_{\text{max}} = 250$  nm). Method M1 in black, method M2 in purple, method M4 in pink, method M5 in blue, method M6 in brown.

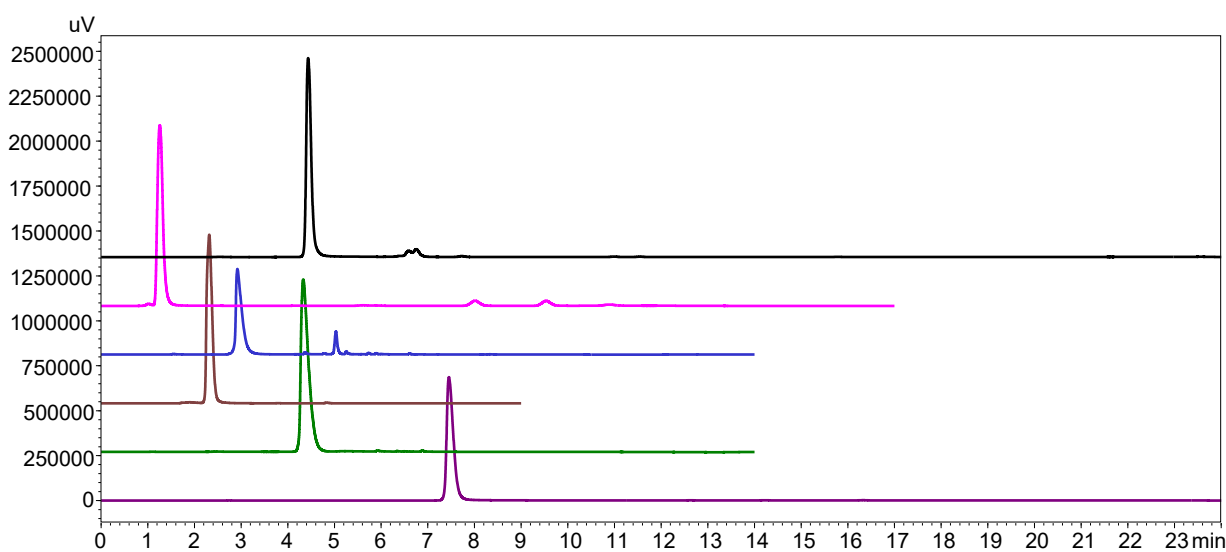

**Figure S28:** Comparison of HPLC chromatograms of **CAT** in various methods ( $\lambda_{\text{max}} = 270$  nm). Method M1 in black, method M2 in purple, method M4 in pink, method M5 in blue, method M6 in brown, method M7 in green.

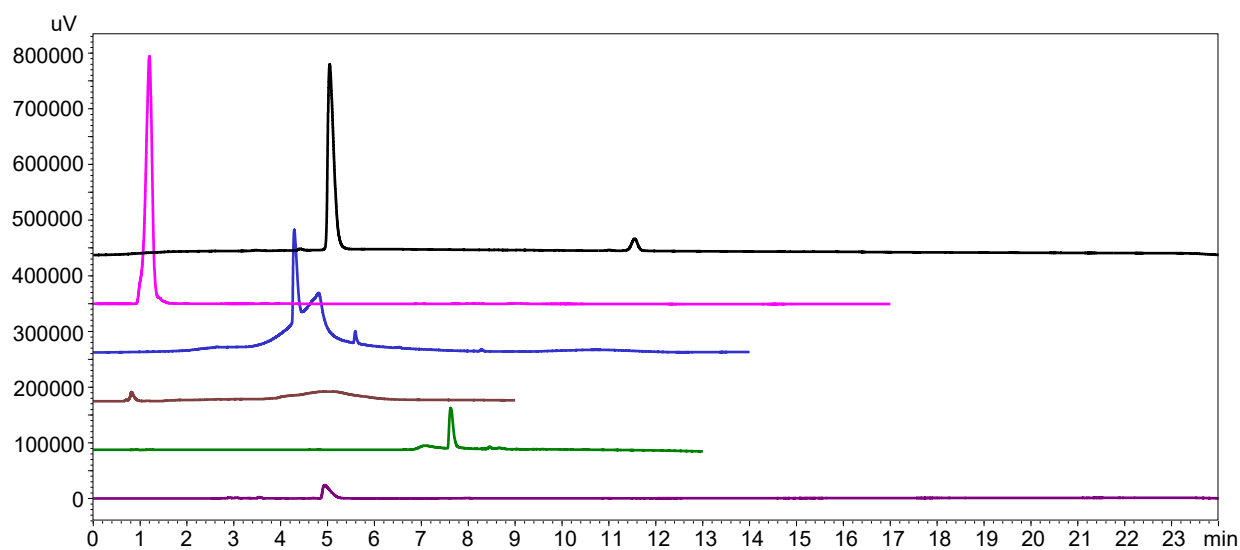

**Figure S29:** Comparison of HPLC chromatograms of **CAT-S** in various methods ( $\lambda_{\max} = 285$  nm). Method M1 in black, method M2 in purple, method M4 in pink, method M5 in blue, method M6 in brown, method M7 in green.

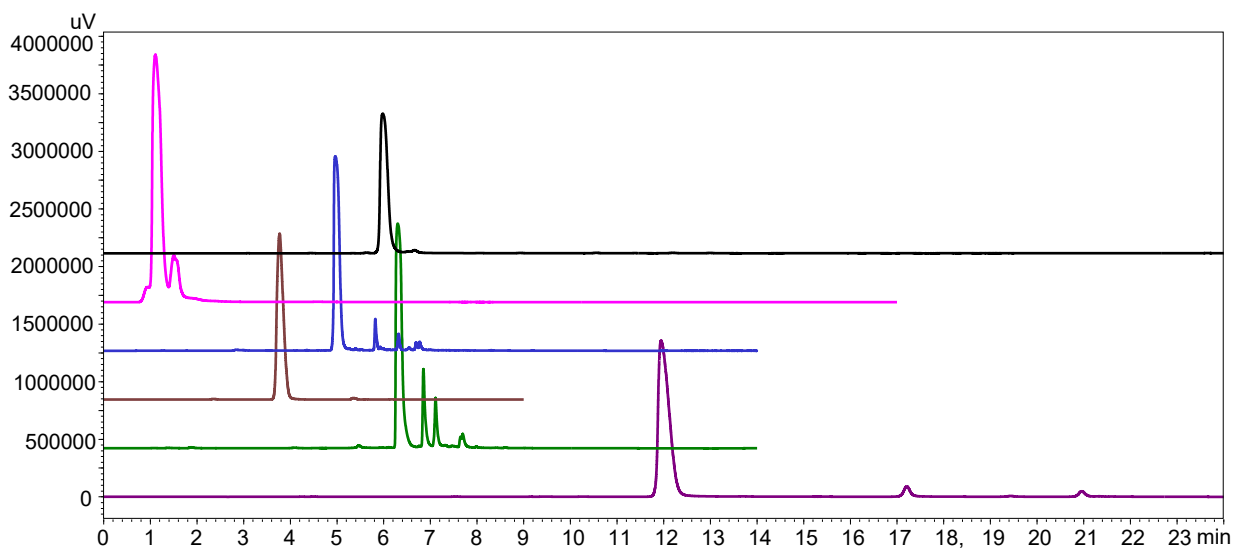

**Figure S30:** Comparison of HPLC chromatograms of **MeCAT** in various methods ( $\lambda_{\max} = 285$  nm). Method M1 in black, method M2 in purple, method M4 in pink, method M5 in blue, method M6 in brown, method M7 in green.

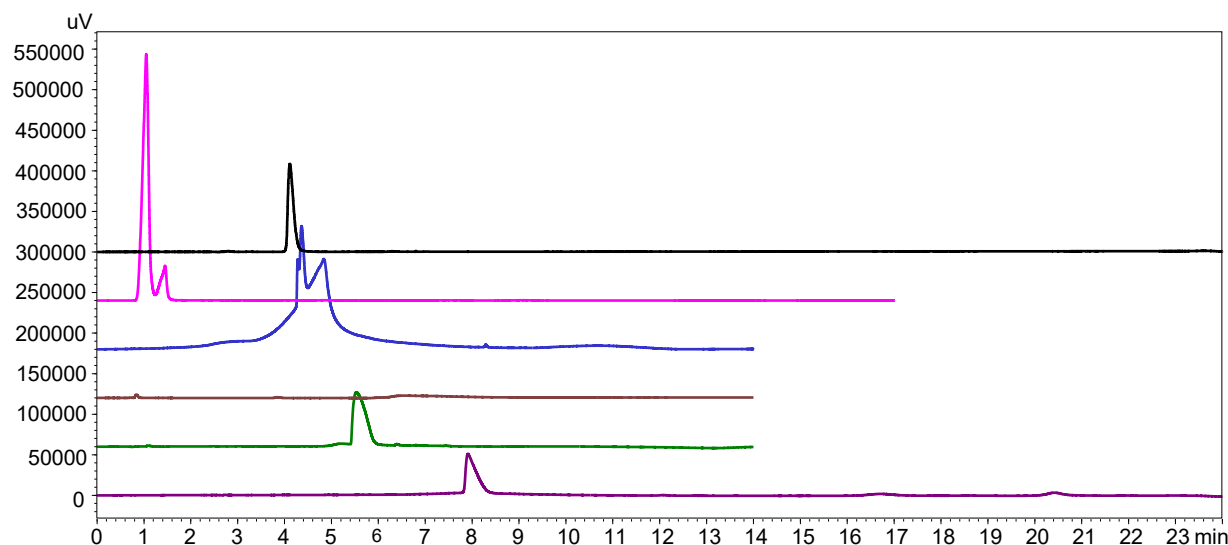

**Figure S31:** Comparison of HPLC chromatograms of **MeCAT-S** in various methods ( $\lambda_{\text{max}} = 285 \text{ nm}$ ). Method M1 in black, method M2 in purple, method M4 in pink, method M5 in blue, method M6 in brown, method M7 in green.

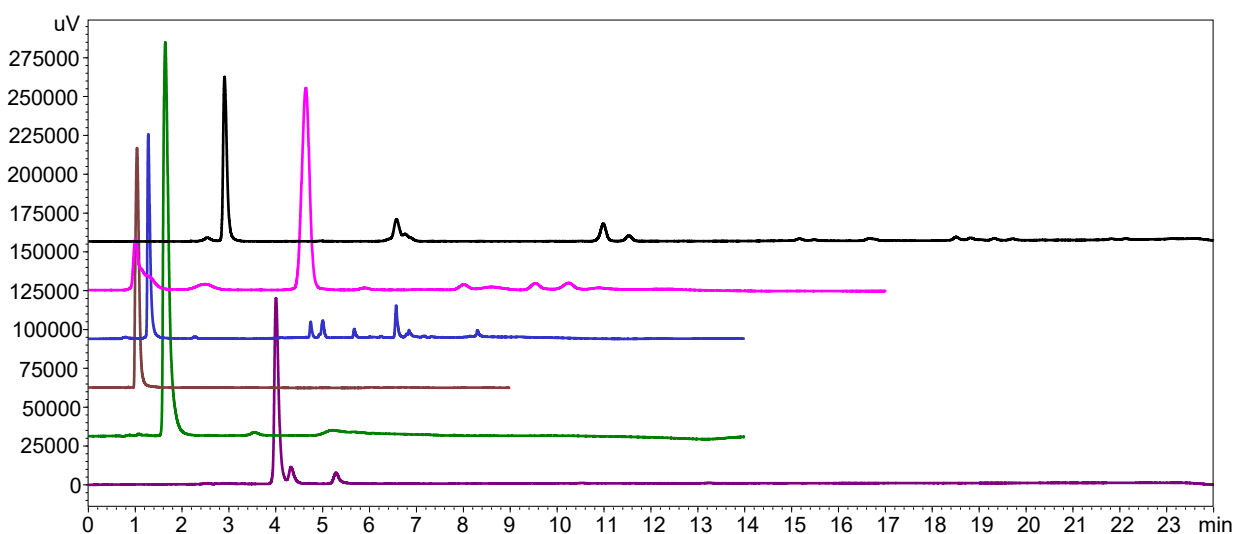

**Figure S32:** Comparison of HPLC chromatograms of **PG** in various methods ( $\lambda_{\text{max}} = 270 \text{ nm}$ ). Method M1 in black, method M2 in purple, method M4 in pink, method M5 in blue, method M6 in brown, method M7 in green.

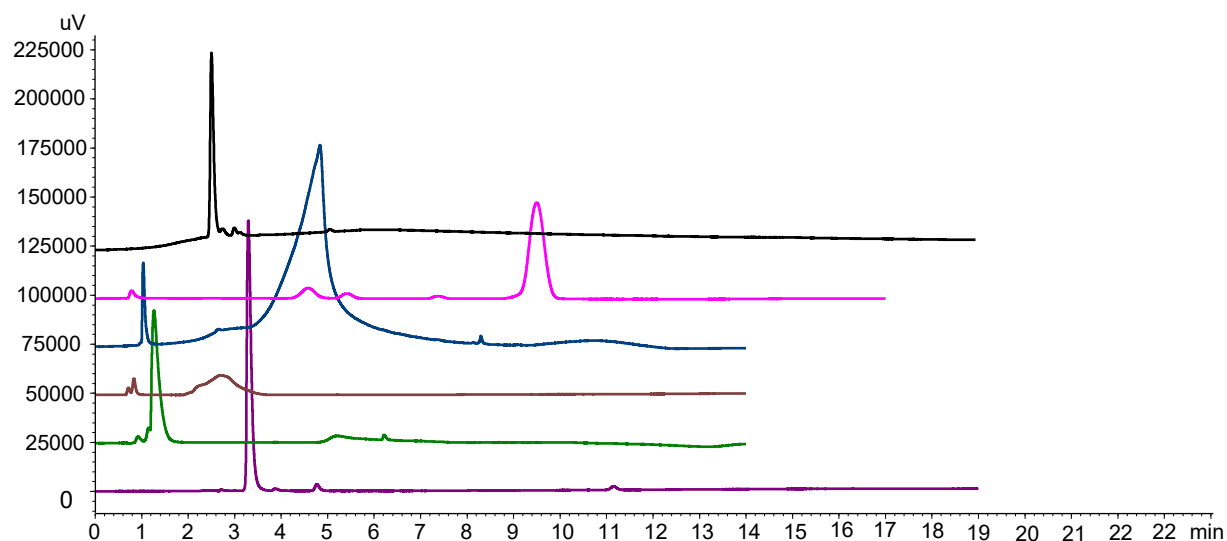

**Figure S33:** Comparison of HPLC chromatograms of **PG-S** in various methods ( $\lambda_{\text{max}} = 270$  nm). Method M1 in black, method M2 in purple, method M4 in pink, method M5 in blue, method M6 in brown, method M7 in green.

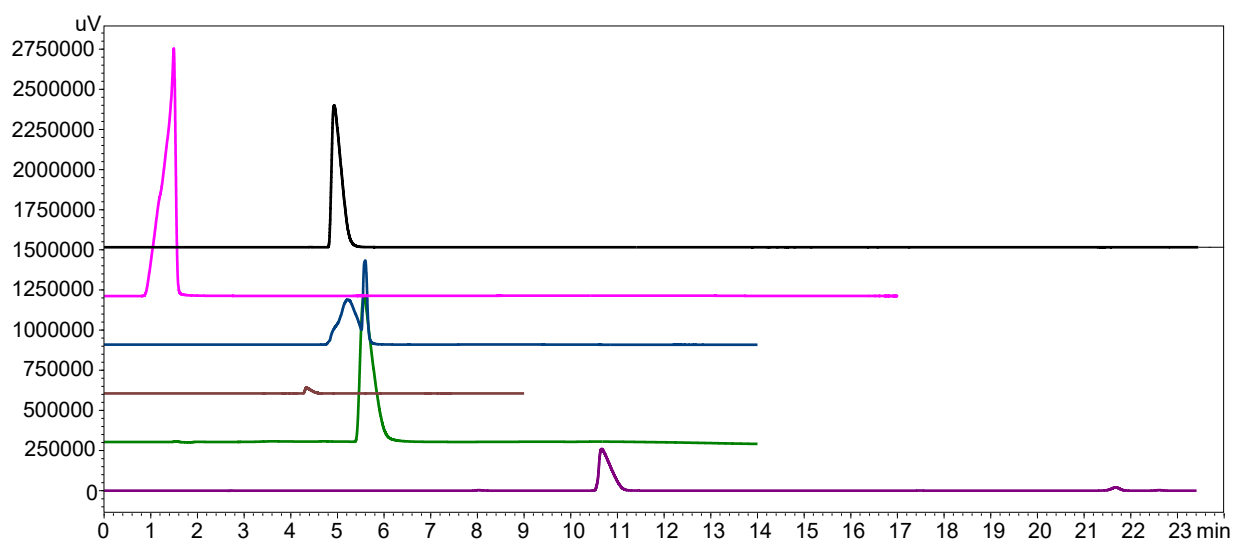

**Figure S34:** Comparison of HPLC chromatograms of **pNP-S** in various methods ( $\lambda_{\text{max}} = 280$  nm). Method M1 in black, method M2 in purple, method M4 in pink, method M5 in blue, method M6 in brown, method M7 in green.

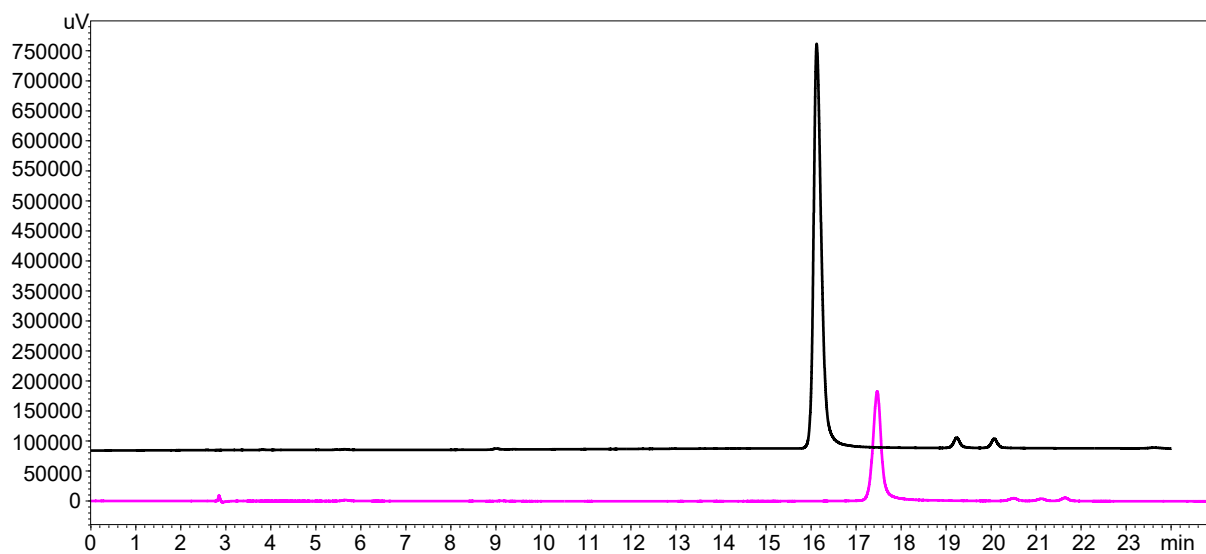

**Figure S35:** Comparison of HPLC chromatograms of **QUE** in various methods ( $\lambda_{\text{max}} = 360$  nm). Method M1 in black, method M3 in pink

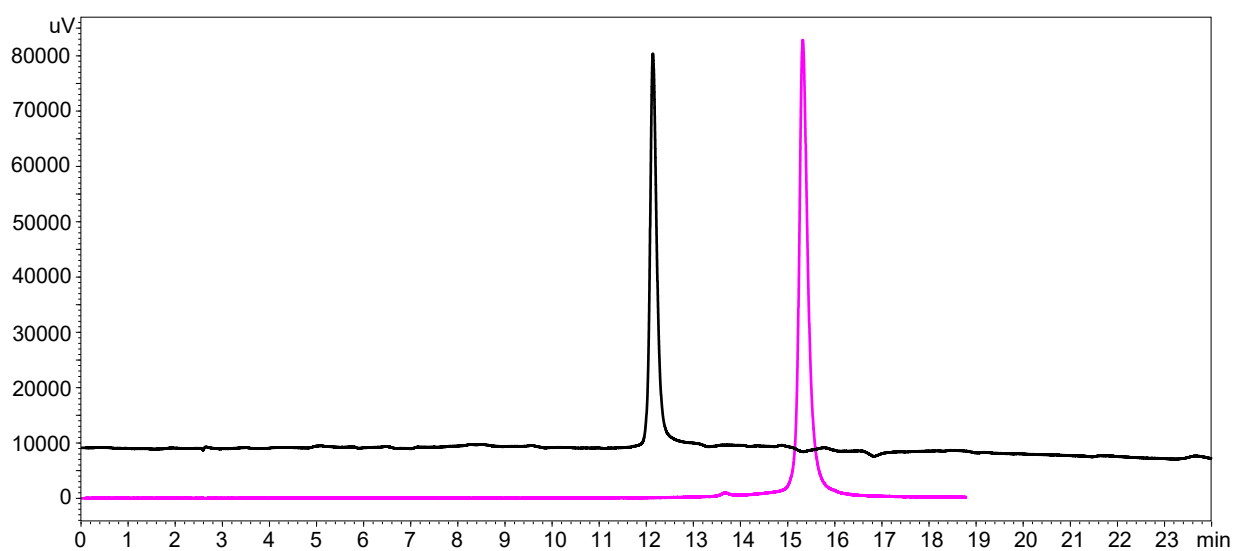

**Figure S36:** Comparison of HPLC chromatograms of **QUE-S** in various methods ( $\lambda_{\text{max}} = 360$  nm). Method M1 in black, method M3 in pink

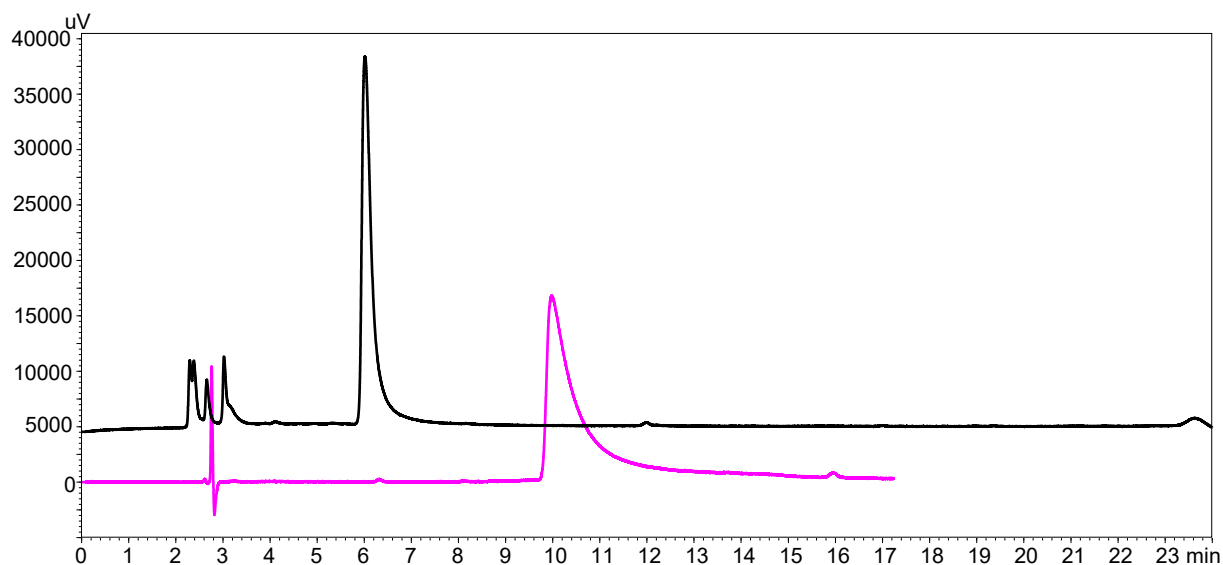

**Figure S37:** Comparison of HPLC chromatograms of **QUE-SS** in various methods ( $\lambda_{\text{max}} = 360$  nm). Method M1 in black, method M3 in pink

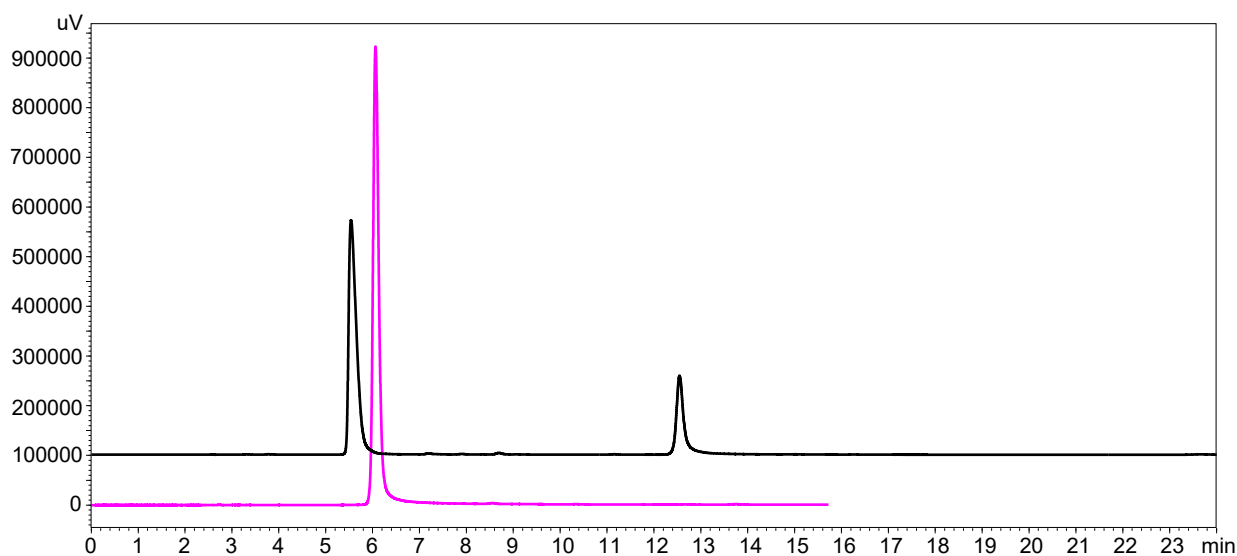

**Figure S38:** Comparison of HPLC chromatograms of **AMP** in various methods ( $\lambda_{\text{max}} = 285$  nm). Method M1 in black, method M3 in pink

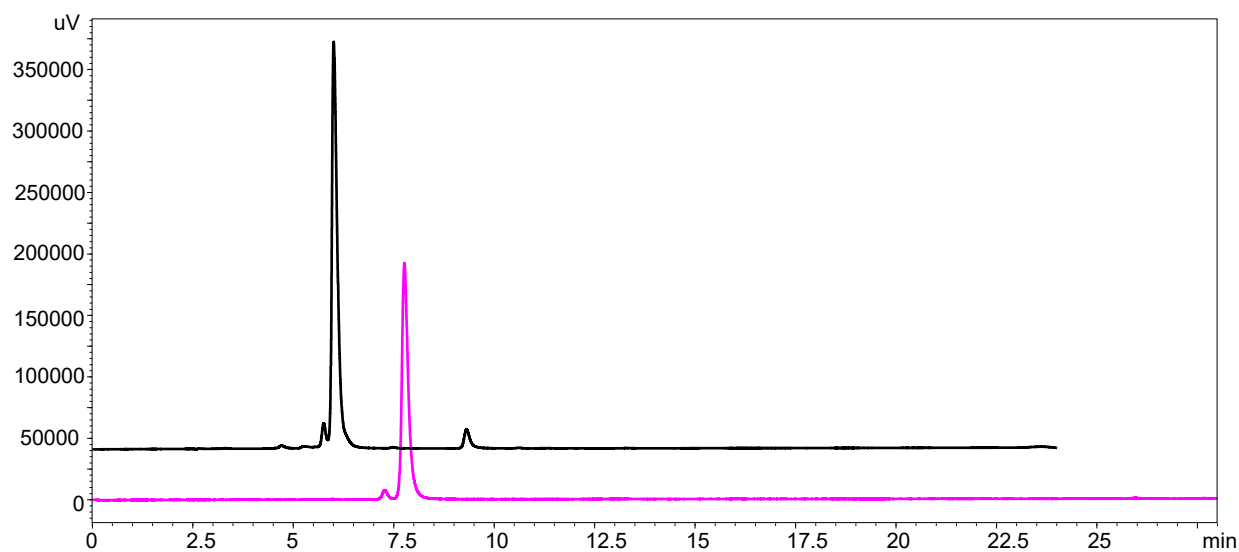

**Figure S39:** Comparison of HPLC chromatograms of **AMP-S** in various methods ( $\lambda_{\text{max}} = 285$  nm). Method M1 in black, method M3 in pink

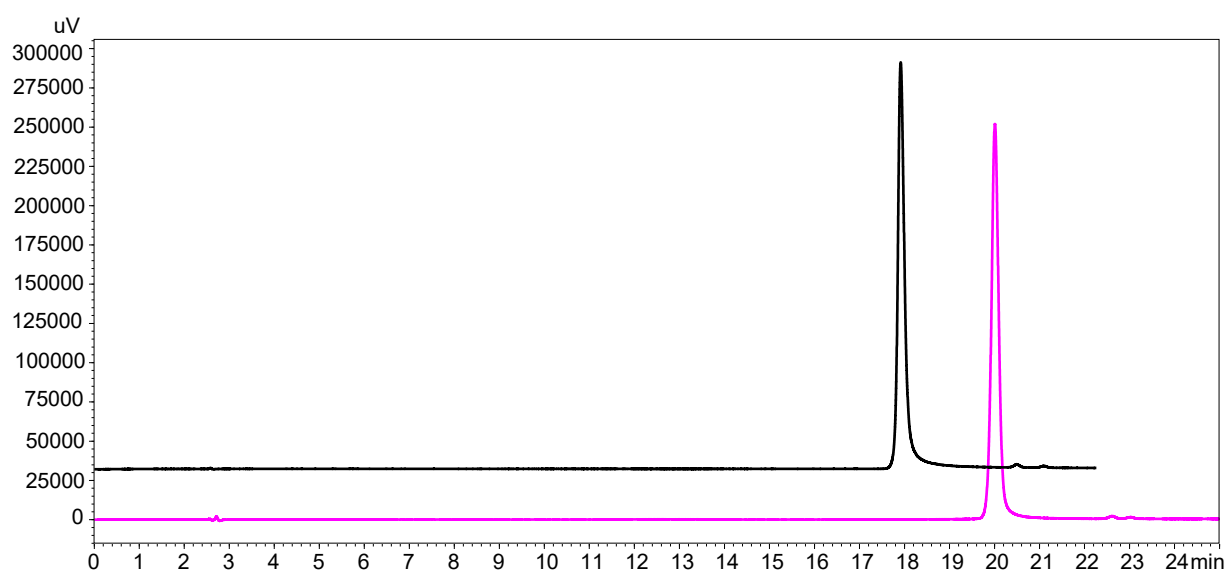

**Figure S40:** Comparison of HPLC chromatograms of **LUT** in various methods ( $\lambda_{\text{max}} = 285$  nm). Method M1 in black, method M3 in pink



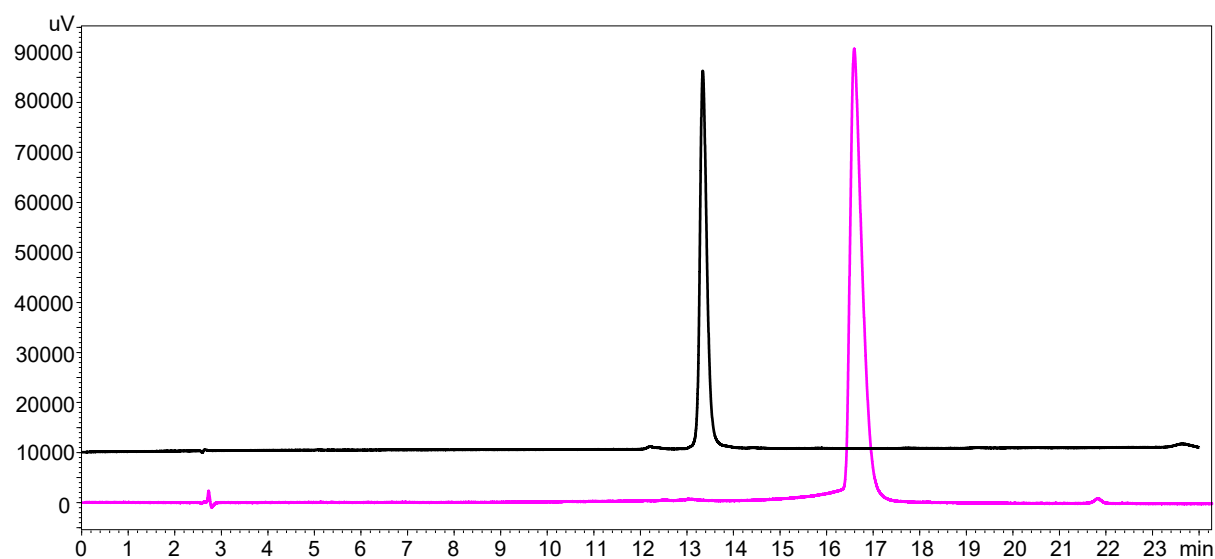

**Figure S41:** Comparison of HPLC chromatograms of LUT-S in various methods ( $\lambda_{\text{max}} = 338$  nm). Method M1 in black, method M3 in pink

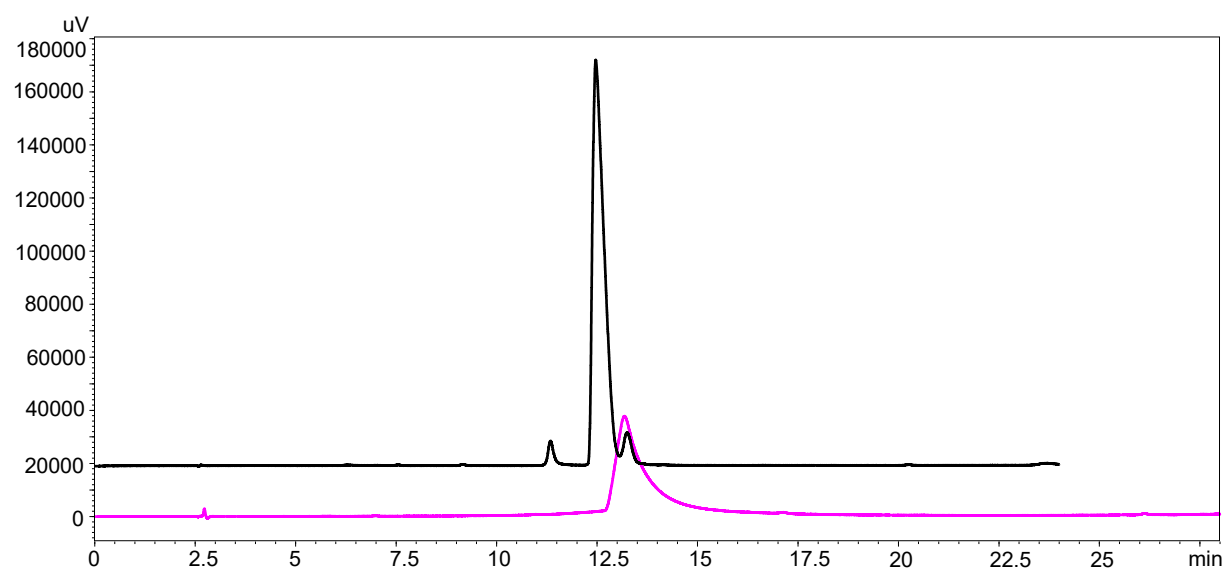

**Figure S42:** Comparison of HPLC chromatograms of LUT-SS in various methods ( $\lambda_{\text{max}} = 338$  nm). Method M1 in black, method M3 in pink

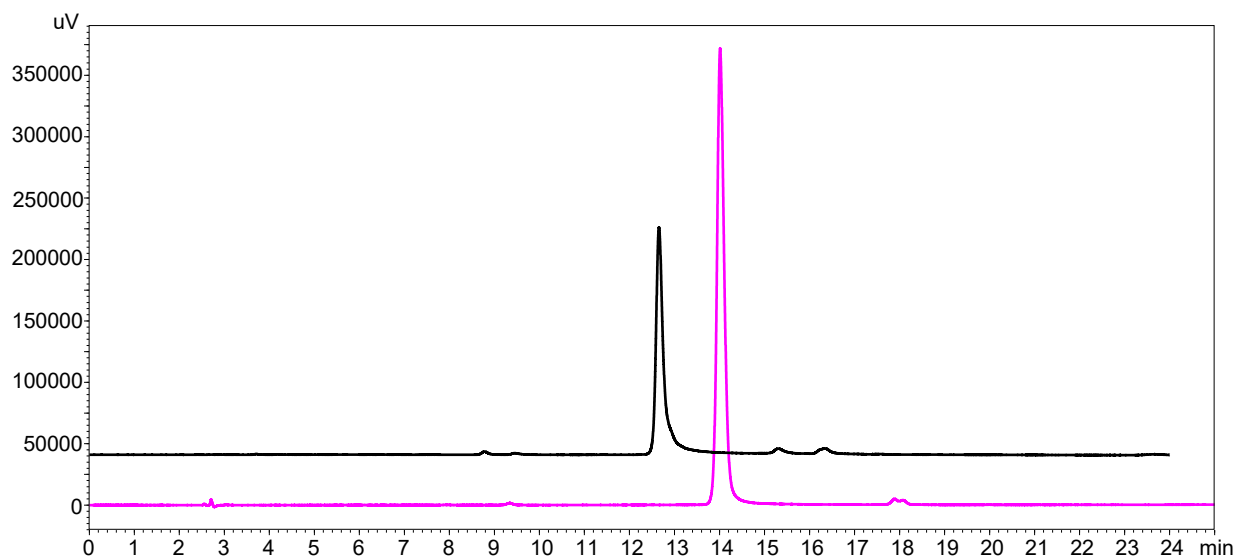

**Figure S43:** Comparison of HPLC chromatograms of **MYR** in various methods ( $\lambda_{\text{max}} = 365$  nm). Method M1 in black, method M3 in pink

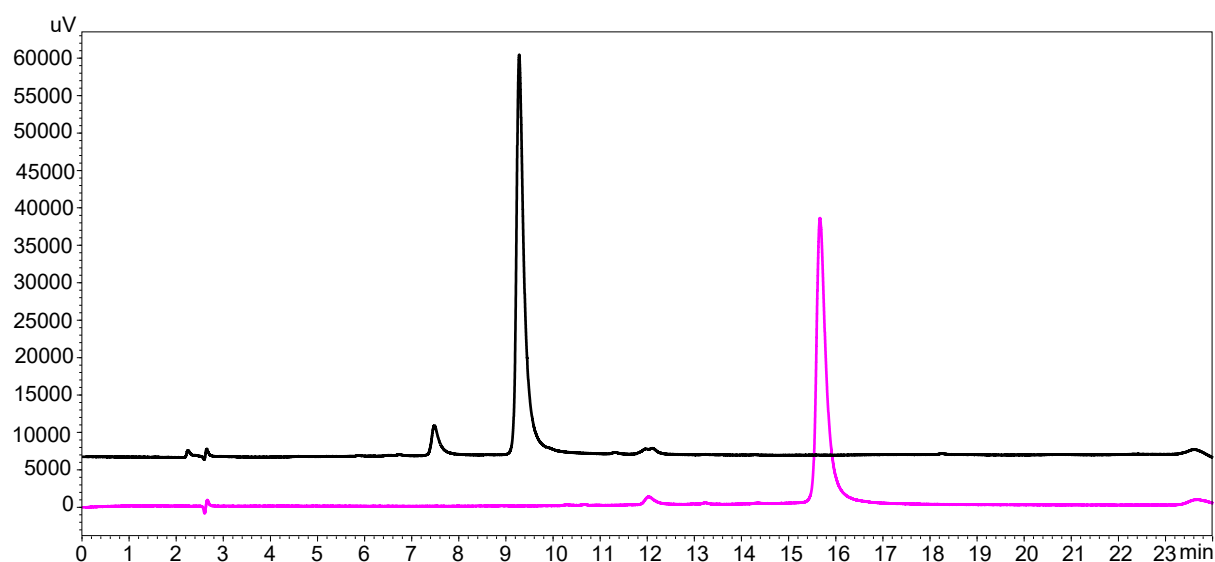

**Figure S44:** Comparison of HPLC chromatograms of **MYR-S** in various methods ( $\lambda_{\text{max}} = 365$  nm). Method M1 in black, method M3 in pink

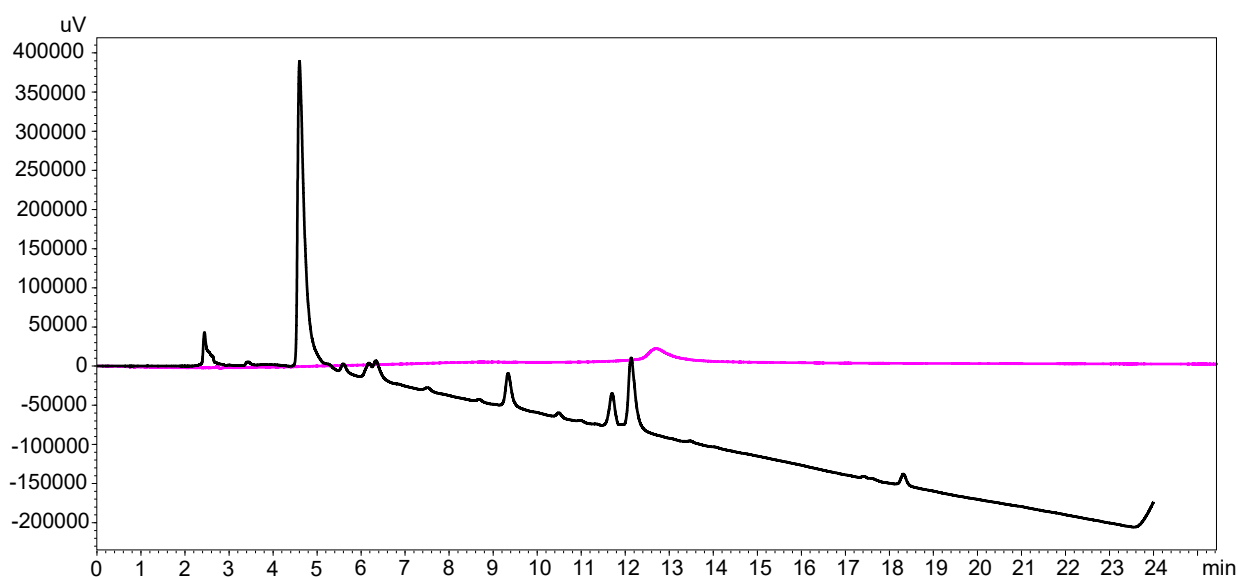

**Figure S45:** Comparison of HPLC chromatograms of **MYR-SS** in various methods ( $\lambda_{\text{max}} = 360$  nm). Method M1 in black, method M3 in pink

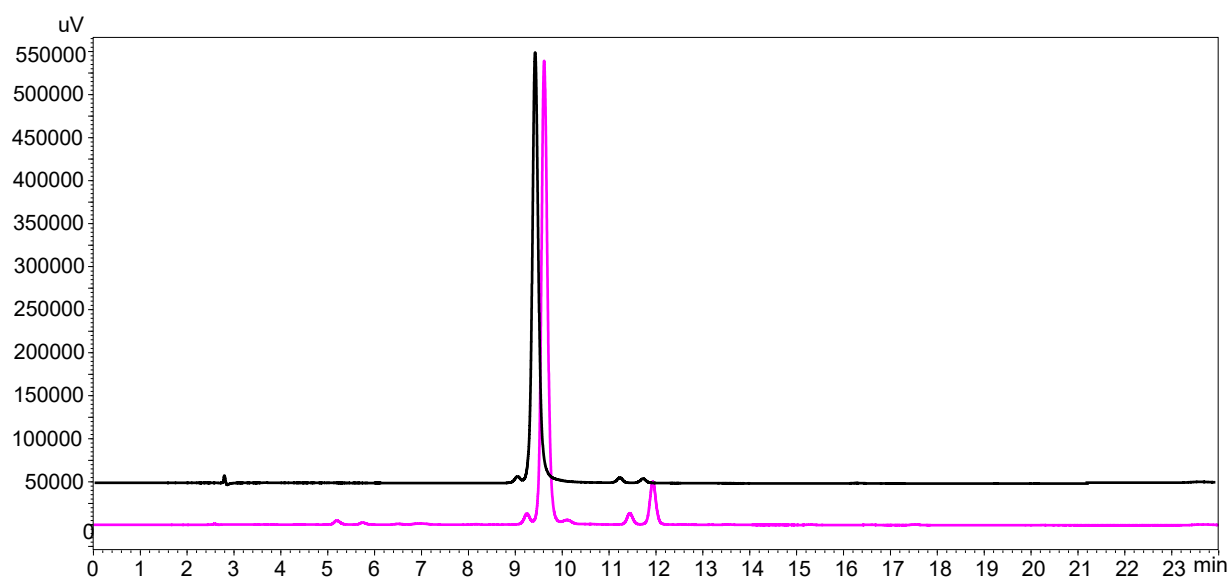

**Figure S46:** Comparison of HPLC chromatograms of **ISQ** in various methods ( $\lambda_{\text{max}} = 355$  nm). Method M1 in black, method M3 in pink

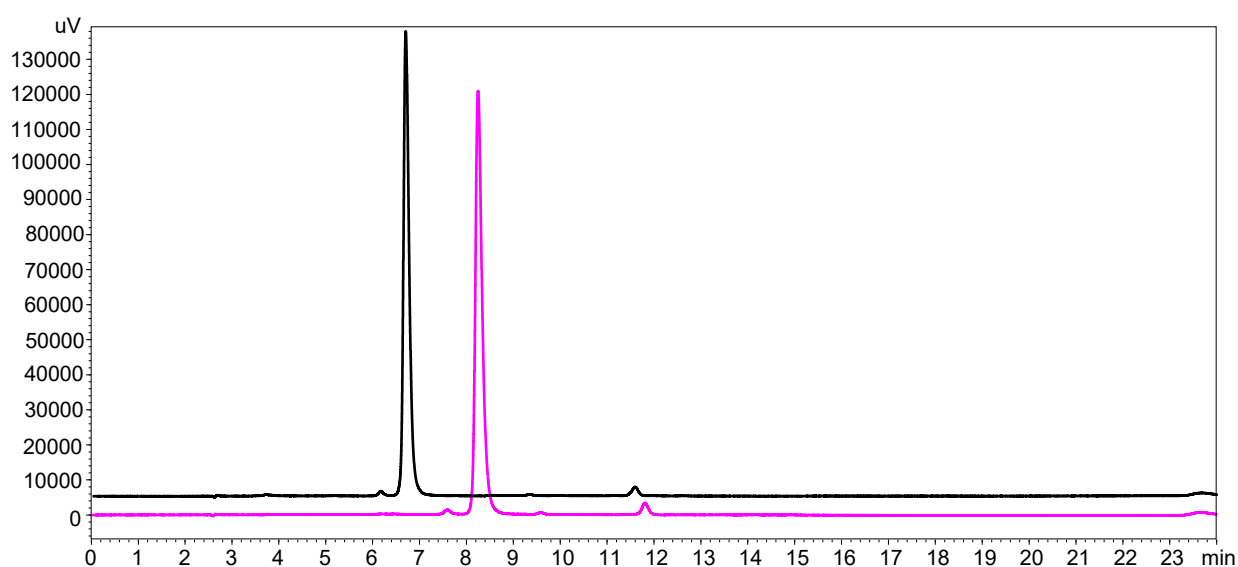

**Figure S47:** Comparison of HPLC chromatograms of **ISQ-S** in various methods ( $\lambda_{\text{max}} = 335$  nm). Method M1 in black, method M3 in pink

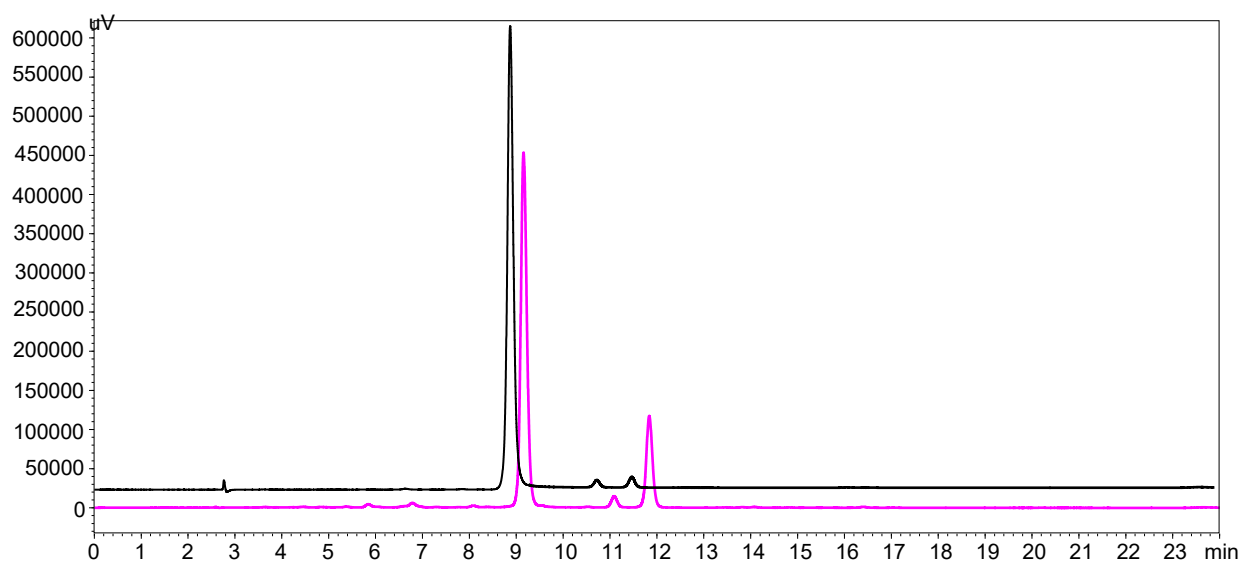

**Figure S48:** Comparison of HPLC chromatograms of **RUT** in various methods ( $\lambda_{\text{max}} = 355$  nm). Method M1 in black, method M3 in pink

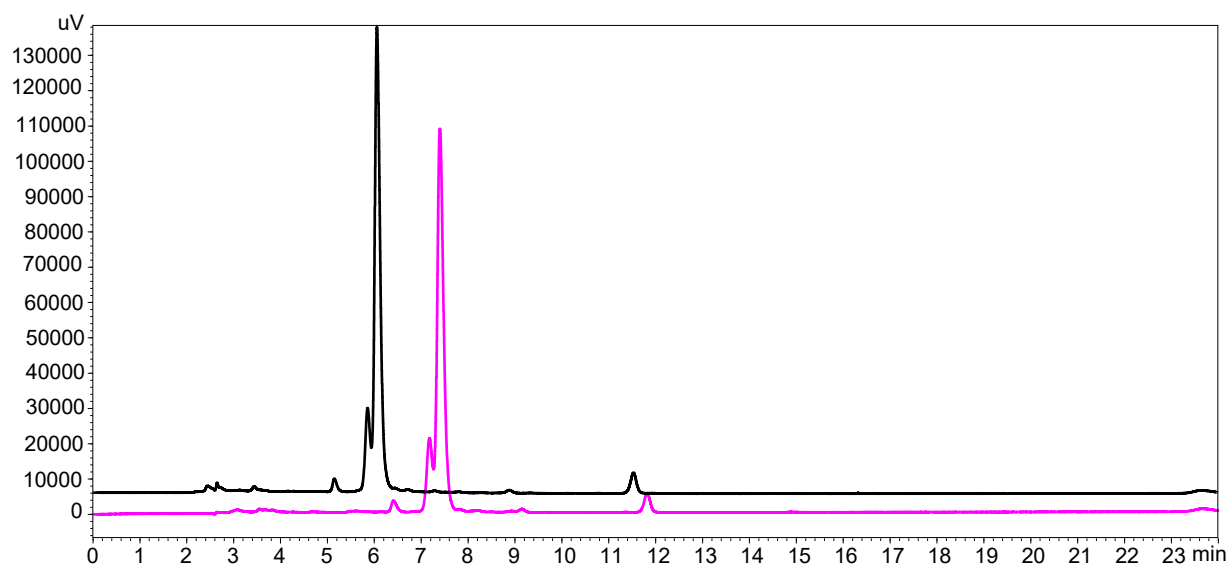

**Figure S49:** Comparison of HPLC chromatograms of **RUT-S** in various methods ( $\lambda_{\text{max}} = 355$  nm). Method M1 in black, method M3 in pink

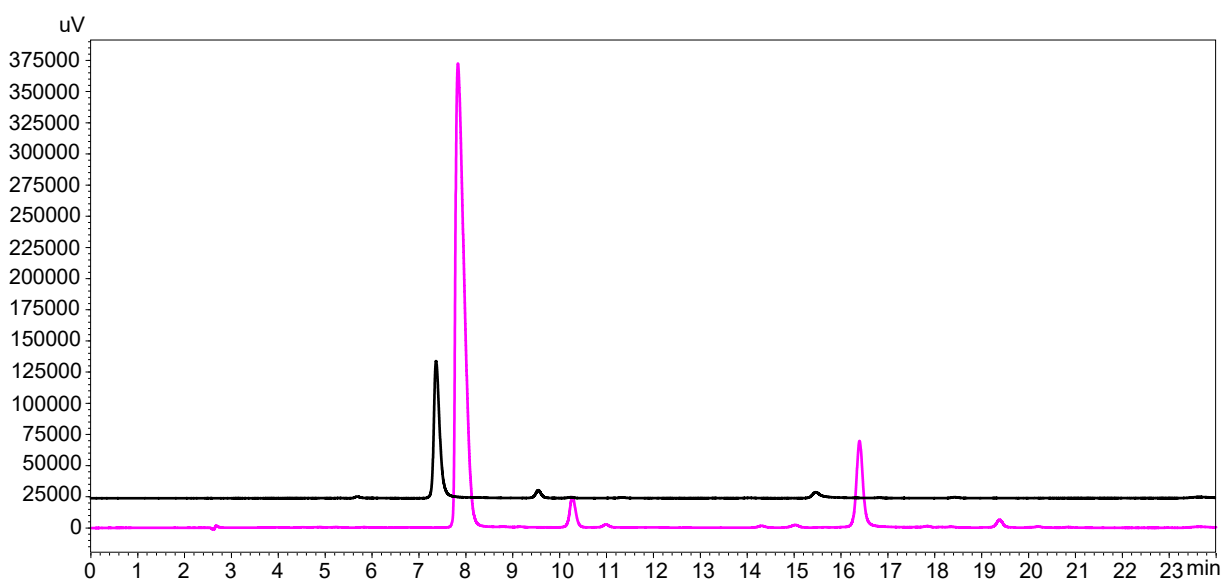

**Figure S50:** Comparison of HPLC chromatograms of **TAX** in various methods ( $\lambda_{\text{max}} = 285$  nm). Method M1 in black, method M3 in pink

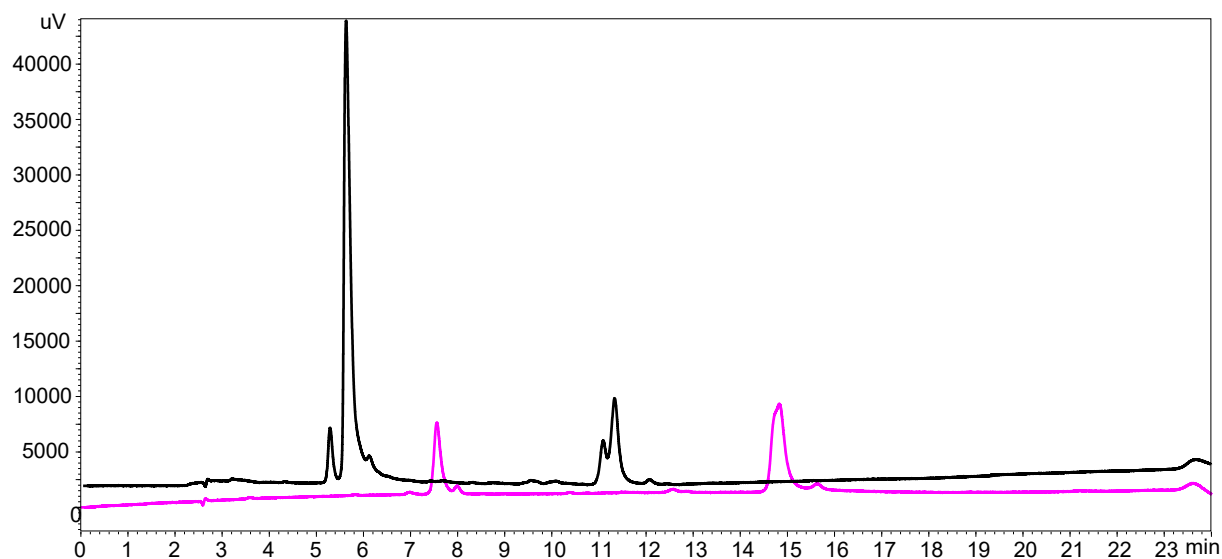

**Figure S51:** Comparison of HPLC chromatograms of **TAX-S** in various methods ( $\lambda_{\text{max}} = 285$  nm). Method M1 in black, method M3 in pink

1. Purchartová, K.; Valentová, K.; Pelantová, H.; Marhol, P.; Cvačka, J.; Havlíček, L.; Křenková, A.; Vavříková, E.; Biedermann, D.; Chambers, C.S.; et al. Prokaryotic and eukaryotic aryl sulfotransferases: Sulfation of quercetin and its derivatives. *ChemCatChem* **2015**, *7*, 3152–3162, <https://doi.org/10.1002/cctc.201500298>.
